# Supplementary material for: Hand exercises for patients with rheumatoid arthritis: an extended follow-up of the SARAH randomised controlled trial
Source: PubMed Central journal article supplement — BMJ Open. 2017 Apr 12;7(4):e013121. doi: 10.1136/bmjopen-2016-013121 (PMC5775458; doi:10.1136/bmjopen-2016-013121), 2017-04-12
Supplement: bmjopen-2016-013121.draft_revisions.pdf [file bmjopen-2016-013121.draft_revisions.pdf]

# BMJ Open

## Hand exercises for patients with rheumatoid arthritis – an extended follow-up of the SARAH randomised controlled trial

|                                 |                                                                                                                                                                                                                                                                                                                                                                                                                                                                                                                                                                                                                               |
|---------------------------------|-------------------------------------------------------------------------------------------------------------------------------------------------------------------------------------------------------------------------------------------------------------------------------------------------------------------------------------------------------------------------------------------------------------------------------------------------------------------------------------------------------------------------------------------------------------------------------------------------------------------------------|
| Journal:                        | <i>BMJ Open</i>                                                                                                                                                                                                                                                                                                                                                                                                                                                                                                                                                                                                               |
| Manuscript ID                   | bmjopen-2016-013121                                                                                                                                                                                                                                                                                                                                                                                                                                                                                                                                                                                                           |
| Article Type:                   | Research                                                                                                                                                                                                                                                                                                                                                                                                                                                                                                                                                                                                                      |
| Date Submitted by the Author:   | 05-Oct-2016                                                                                                                                                                                                                                                                                                                                                                                                                                                                                                                                                                                                                   |
| Complete List of Authors:       | Williamson, Esther; University of Oxford, Nuffield Department of Orthopaedics, Rheumatology and Musculoskeletal Sciences<br>McConkey, Chris; University of Warwick Warwick Medical School, Clinical Trials Unit<br>Heine, Peter; University of Oxford, Nuffield Department of Orthopaedics, Rheumatology and Musculoskeletal Sciences<br>Dosanjh, Sukhdeep; University of Warwick Warwick Medical School, Clinical Trials Unit<br>Williams , Mark ; Oxford Brookes University, Sport and Health Sciences<br>Lamb, Sarah; University of Oxford, Nuffield Department of Orthopaedics, Rheumatology and Musculoskeletal Sciences |
| <b>Primary Subject Heading</b>: | Rheumatology                                                                                                                                                                                                                                                                                                                                                                                                                                                                                                                                                                                                                  |
| Secondary Subject Heading:      | Rehabilitation medicine, Sports and exercise medicine                                                                                                                                                                                                                                                                                                                                                                                                                                                                                                                                                                         |
| Keywords:                       | Exercise, Adherence, Rheumatoid Arthritis, Hand therapy                                                                                                                                                                                                                                                                                                                                                                                                                                                                                                                                                                       |
|                                 |                                                                                                                                                                                                                                                                                                                                                                                                                                                                                                                                                                                                                               |

SCHOLARONE™  
Manuscripts

1  
2  
3 Hand exercises for patients with rheumatoid arthritis – an extended follow-up of the SARAH  
4 randomised controlled trial  
5

6  
7 Corresponding author: Dr Esther Williamson  
8

9  
10 Postal Address: The Botnar Research Centre, Old Road, Headington, Oxford OX3 7LD  
11

12 Email: [Esther.williamson@ndorms.ox.ac.uk](mailto:Esther.williamson@ndorms.ox.ac.uk)  
13

14 Telephone: 01865 223120  
15

16  
17 Authors

18  
19 Esther Williamson, Centre for Rehabilitation Research, Nuffield Department of Orthopaedics,  
20 Rheumatology and Musculoskeletal Sciences, University of Oxford, Oxford, United Kingdom  
21

22  
23 Chris McConkey, Clinical Trials Unit, University of Warwick, Coventry, United Kingdom  
24

25  
26 Peter Heine, Centre for Rehabilitation Research, Nuffield Department of Orthopaedics,  
27 Rheumatology and Musculoskeletal Sciences, University of Oxford, Oxford, United Kingdom  
28

29  
30 Sukhdeep Dosanjh, Clinical Trials Unit, University of Warwick, Coventry, United Kingdom  
31

32  
33 Mark Williams, Department of Sports and Health Sciences, Oxford Brookes University, Oxford,  
34 United Kingdom  
35

36  
37 Sarah E Lamb, Centre for Rehabilitation Research, Nuffield Department of Orthopaedics,  
38 Rheumatology and Musculoskeletal Sciences, University of Oxford, Oxford, United Kingdom and  
39 Clinical Trials Unit, University of Warwick, Coventry, United Kingdom  
40

41  
42 Key words: exercise, adherence, rheumatoid arthritis, hand function  
43

44  
45 Word count: 2948  
46

47  
48 2 figures and 4 tables  
49  
50  
51  
52  
53  
54  
55  
56  
57  
58  
59  
60

1  
2  
3 Abstract

4  
5 Objectives:

6  
7  
8 The SARAH [Stretching And strengthening for Rheumatoid Arthritis of the Hand] randomised  
9 controlled trial evaluated the effectiveness of a hand exercise programme and demonstrated it was  
10 clinically and cost effective at 12 months. The aim of this extended follow-up was to evaluate the  
11 effects of the SARAH programme beyond 12 months.  
12  
13

14  
15 Methods:

16  
17 Using postal questionnaires, we collected the Michigan Hand Questionnaire (MHQ) hand function  
18 (primary outcome), ADL and work subscales, pain troublesomeness, self-efficacy, self-reported hand  
19 exercise performance and health related quality of life. Mean difference in hand function scores  
20 were analysed by a linear model, adjusted for baseline score.  
21  
22  
23

24  
25 Results:

26  
27 Two thirds (n=328/490, 67%) of the original cohort provided data for the extended follow-up. The  
28 mean follow-up time was 26 months (range 19-40 months).  
29  
30

31  
32 There was no difference in change in hand function scores between the two groups at extended  
33 follow-up [mean difference (95%CI) 1.52 (-1.71 to 4.76)]. However, exercise group participants  
34 were still significantly improved compared to baseline (p=0.0014) unlike the best practice usual care  
35 group (p=0.1122). Self-reported performance of hand exercises had reduced substantially.  
36  
37

38  
39 Conclusions:

40  
41 Participants undertaking the SARAH exercise programme had improved hand function compared to  
42 baseline more than 2 years after randomisation. Hand function remained better than the control  
43 group but the between group difference was no longer statistically significant. The reduction in hand  
44 function compared to earlier follow-up points coincided with a reduction in self-reported  
45 performance of hand exercises. Further intervention to promote long term adherence may be  
46 warranted.  
47  
48  
49  
50  
51  
52  
53  
54  
55  
56  
57  
58  
59  
60

**Strengths and limitations of this study**

There was a lack of evidence regarding the long term effectiveness of hand exercises for improving hand function in patients with rheumatoid arthritis (RA) beyond 12 months.

This paper reports on the extended follow up (average follow up of 26 months) of a trial evaluating the effectiveness of a an individually tailored, progressive stretching and strengthening hand exercise programme for people with RA.

The benefits of the exercises evident at 12 months follow up had reduced but not completely diminished, however, so had adherence with the exercise programme.

This study highlights the importance of supporting patients with RA to maintain regular exercise.

The extended follow up was not planned at the start of the trial so the response rate is lower than that of the main trial.

## INTRODUCTION

Rheumatoid arthritis (RA) is the most common inflammatory polyarthritis[1]. Hand dysfunction is common and to address this, exercises are recommended[2, 3]. Recommendations include exercises for enhancing flexibility, muscle strength and managing functional impairments[2]. Limited evidence of the effectiveness of hand exercises for people with RA[4-8] led to the commissioning of the Stretching and Strengthening for Rheumatoid Arthritis of the Hand (SARAH) Trial (ISRCTN89936343)[9, 10]. The SARAH Trial demonstrated that an individually tailored, progressive stretching and strengthening hand exercise programme improved hand function and was cost-effective compared to usual care over a 12 month period[11, 12]. However, there remained a lack of evidence regarding the long term effect of hand exercises.

Adherence to any exercise programme is crucial[13]. Support provided by health professionals enhances adherence with exercises but adherence is challenging when unsupervised[14]. The SARAH exercise programme was prescribed by a physiotherapist or occupational therapist who provided a maximum of six supervisory sessions during a three month period. During the sessions exercises were tailored to ensure maximal effect, and adherence promoted using a well-recognised behavioural framework[15]. It was intended that participants would carry out exercises daily at home during and beyond the supervised period.

The aim of the extended follow-up study was to estimate adherence to the intervention after the three month supervisory period, and the clinical effects of the SARAH exercise programme beyond 12 months.

## METHODS

### Study design

A pragmatic, multi-centre, randomised controlled trial carried out in 17 National Health Service (NHS) Hospitals in the United Kingdom[11].

### Participants

Participants were adults ( $\geq 18$  years) with RA affecting their hands, who were either not on a disease-modifying anti-rheumatic drugs (DMARD) regime, or who had been on a stable DMARD regimen (including biologic agents) for three months or more. RA was defined using the American College of

1  
2  
3 Rheumatology criteria[16] . People who had upper limb surgery or fracture in the previous six  
4 months, were waiting for upper limb surgery or were pregnant were excluded.  
5  
6

### 7 **Study procedures**

8  
9 Potential participants were approached during clinic visits or from clinic records (October 2009 and  
10 May 2011) and provided with a written invitation and information sheet. A researcher arranged an  
11 appointment to discuss the trial, check eligibility, and if appropriate, complete baseline assessments  
12 and randomise participants. Follow-up data was collected 4 and 12 months after randomisation at  
13 face to face appointments. The extended follow-up (>12 months) was an addition to the original  
14 study protocol [9]. Approval was granted for all elements of the study by the Oxford C Multicenter  
15 Research Ethics Committee [REC reference 08/H0606/4] and by hospital Research and Development  
16 departments. Extended follow-up questionnaires were posted to all participants (unless they had  
17 withdrawn from the study or were deceased) between September 2012 and January 2013 so the  
18 time for extended follow-up varied between participants. Informed consent was provided by all  
19 participants. Participants who agreed to participate in the extended follow-up completed a response  
20 form indicating their consent and returned this with their questionnaire. Participants could request  
21 to complete the questionnaire over the phone. If participants did not respond to the extended  
22 follow-up invitation one reminder letter was sent.  
23  
24  
25  
26  
27  
28  
29  
30  
31

### 32 **Interventions**

33  
34 The control intervention was best practice usual care consisting of joint protection education, advice  
35 on whole body mobility exercises and, if appropriate, functional splinting delivered over a maximum  
36 of three appointments. Participants in the intervention arm received best practice usual care and an  
37 individually tailored exercise programme, in which moderate to high intensity strengthening and  
38 stretching exercises were prescribed. Therapists used supervisory sessions to provide advice, check  
39 tolerability, progress or regress exercises and promote adherence. Treatments are described in  
40 detail elsewhere [10].  
41  
42  
43  
44  
45

### 46 **Data collection**

47  
48  
49 Baseline measures

50  
51  
52 Measurements collect at baseline are described elsewhere[12]. These included demographics,  
53 Michigan Hand Outcome Questionnaire (MHQ) [17-19], pain troublesomeness[20], Arthritis Self-  
54 efficacy Scale[21], the EuroQol EQ5D[22], the 12 item short form health survey (SF-12)[23],  
55 impairment (grip strength, dexterity, hand and wrist range of motion and joint alignment),  
56  
57  
58  
59  
60

1  
2  
3 Erythrocyte Sedimentation Rate (ESR), C-Reactive Protein (CRP), modified tender and swollen joint  
4 count of the hands and wrist[24] and medication use.  
5  
6

#### 7 Outcome measures

8  
9 We reduced the number of questionnaires included in the extended follow-up because of the postal  
10 mode of administration. This included the primary outcome (Michigan Hand Questionnaire (MHQ)  
11 hand function subscale) for which scores ranged from 0 to 100, with higher scores indicating better  
12 performance. Secondary outcomes were the activities of daily living (ADL) and work MHQ subscales,  
13 pain troublesomeness [20], participant-rated improvement, Arthritis Self-efficacy[21], the EuroQol  
14 EQ5D[22] and the 12 item short form health survey (SF-12)[23]. To assess adherence with the  
15 exercise programme, all participants were asked to report how often they performed hand exercises  
16 for their RA.  
17  
18  
19  
20  
21  
22

#### 23 **Sample size estimates**

24  
25 The SARAH trial was sized to detect a small to moderate effect size of 0.3 in the primary outcome at  
26 12 months. This was based on a previous smaller efficacy study of exercise that reported a  
27 standardised difference of 0.4 (8). We modified this effect downward to account for the SARAH trial  
28 being a pragmatic multicenter trial and to reflect worthwhile effects found in other pragmatic  
29 studies of RA[25]. To show this difference with 80% power at the 5% significance level, we required  
30 data on a total of 352 participants (using SAS procedure GLMPOWER) for analysis. Allowing for a  
31 25% loss to follow-up, at least 469 participants were needed.  
32  
33  
34  
35  
36

#### 37 **Randomisation**

38  
39 We used a central telephone randomisation service at the Warwick Clinical Trials Unit.  
40 Randomisation was stratified by center, and used a variable block length. Allocation was computer-  
41 generated and revealed once the participant was registered into the trial. It was not possible to blind  
42 participants and therapists delivering treatments to treatment allocation but follow-up data was  
43 collected by blinded research staff.  
44  
45  
46  
47

#### 48 **Statistical analysis**

49  
50 The analysis was intention to treat. Descriptive statistics were generated to compare people  
51 completing extended follow-up and those not, and the characteristics of randomised groups to  
52 identify any selection and retention biases. We only report earlier outcomes (baseline, 4 and 12  
53 months) for those participants that took part in the extended follow-up. For all outcomes, we  
54 estimated within and between group differences at each time point (as well as overall) using a linear  
55  
56  
57  
58  
59  
60

1  
2  
3 model. Estimates of treatment effect were reported as the mean difference and 95% confidence  
4 interval. All models were adjusted for baseline MHQ score and pre-randomisation drug regime  
5 (Biologic DMARDs, Combination non-biologic DMARDs, Single non-biologic DMARD, No DMARD).  
6 The inclusion of time-to-follow up allowed adjustment for variable amounts of follow-up, and an  
7 estimation of the impact of duration of follow-up on the treatment effect. Multiple imputation  
8 estimates for MHQ overall hand function were also calculated for the extended follow-up time-point  
9 and adjusted for hospital, age and sex. The multiple imputation took account of the MHQ hand  
10 function score for all time-points, and baseline data (age, CRP, ESR, SF12 physical and mental  
11 summary scores, pain troublesomeness, confidence, impairment measurements, and DMARD  
12 group).

13  
14  
15  
16  
17  
18  
19  
20 Secondary outcome measures of change in pain, quality of life and self-efficacy were analysed in a  
21 similar manner. Patient rated improvement was compared using the Wilcoxon test. Report of  
22 current exercise performance was categorised as at least 3 times per week, less than 3 times per  
23 week and no exercise and was analysed using Pearson's chi-squared.

24  
25  
26  
27 Statistical analyses used SAS V9.2 software (SAS Institute Inc., USA).

## 28 29 30 31 **RESULTS**

### 32 33 34 **Characteristics of the sample**

35  
36 The baseline characteristics are given in Table 1. Just over two-thirds of the original cohort (n=328  
37 67%) provided data (Figure 1). On average, participants completed the extended follow-up 26  
38 months after randomisation, with no difference between the groups [exercise: median time of 25.8  
39 months (IQR 22.0-30.8); best practice usual care: median time of 26 months (IQR 22.2-29.9);  
40 P=0.6522]. An analysis performed to see if the time of extended follow-up (which varied from 19 to  
41 40 months after randomisation) was associated with outcome showed there was no significant time  
42 effect (p=0.1399).

43  
44  
45  
46  
47 The two groups at extended follow-up were similar in age, gender, disease duration and baseline EQ-  
48 5D scores.

### 49 50 51 52 **Figure 1 – CONSORT Flow diagram**

53  
54 The characteristics of participants who did and did not respond to the extended follow-up are  
55 provided in Table 1. The average age of responders was 63.6 years (SD 10.9) and 75.6% (248/328)  
56 were women, which was similar to the demographic of the entire sample at baseline. However, non-  
57  
58  
59  
60



1  
2  
3 responders had worse hand function at baseline than responders (scores 48.1 and 54.0 respectively).  
4  
5 The proportion of participants reporting that they were performing hand exercises for their RA at  
6  
7 earlier follow-up points was higher amongst responders compared to non-responders (Table 1)  
8  
9 although the difference was not statistically significant ( $p=0.1323$  and  $p=0.2598$ ). Most notably, a  
10  
11 greater proportion of non-responders in the exercise arm reported doing no exercise at 12 months  
12  
13 compared to those who responded (44.4% versus 24.5% respectively;  $p=0.0488$ ).  
14  
15  
16  
17  
18  
19  
20  
21  
22  
23  
24  
25  
26  
27  
28  
29  
30  
31  
32  
33  
34  
35  
36  
37  
38  
39  
40  
41  
42  
43  
44  
45  
46  
47  
48  
49  
50  
51  
52  
53  
54  
55  
56  
57  
58  
59  
60

For peer review only

Table 1 – Characteristics of participants completing and not completing the extended follow-up by arm

| Characteristic by arm                                  | Participants completing the extended follow-up | Participants not completing the extended follow-up | Participants completing the extended follow-up | Participants not completing the extended follow-up | Participants completing the extended follow-up | Participants not completing the extended follow-up |
|--------------------------------------------------------|------------------------------------------------|----------------------------------------------------|------------------------------------------------|----------------------------------------------------|------------------------------------------------|----------------------------------------------------|
| Study arm                                              | Exercise programme                             |                                                    | Usual Care                                     |                                                    | Combined                                       |                                                    |
| Age at randomisation, Mean (SD)                        | 62.9 (11.0)                                    | 58.6 (14.0)                                        | 64.3 (10.8)                                    | 61.5 (12.1)                                        | 63.6 (10.9)                                    | 59.8 (13.2)                                        |
| Sex, F (%)                                             | 77.4                                           | 74.7                                               | 74.0                                           | 81.2                                               | 75.6                                           | 77.5                                               |
| <b>Ethnic Origin, n (%)</b>                            |                                                |                                                    |                                                |                                                    |                                                |                                                    |
| White                                                  | 85 (93.4)                                      | 153 (98.7)                                         | 66 (95.7)                                      | 169 (98.3)                                         | 151 (93.4)                                     | 322 (98.5)                                         |
| Indian                                                 | 2 (2.2)                                        | 1 (0.7)                                            | -                                              | 2 (1.2)                                            | 2 (1.3)                                        | 3 (0.9)                                            |
| Pakistani                                              | -                                              | -                                                  | 1 (1.5)                                        | -                                                  | 1 (0.6)                                        | -                                                  |
| Mixed                                                  | 2 (2.2)                                        | 1 (0.7)                                            | 1 (1.5)                                        | -                                                  | 3 (1.9)                                        | 1 (0.3)                                            |
| Other                                                  | 2 (2.2)                                        | -                                                  | 1 (1.5)                                        | 1 (0.6)                                            | 3 (1.9)                                        | 1 (0.3)                                            |
| <b>Disease duration (years), Mean (SD)</b>             | 12.4 (10.8)                                    | 14.4 (10.4)                                        | 14.7 (12.5)                                    | 12.4 (10.7)                                        | 13.7 (11.8)                                    | 13.5 (10.6)                                        |
| <b>Baseline ESR Median (IQR)</b>                       | 13.0 (7.0, 26.0)                               | 21.0 (9.0,30.0)                                    | 17.0 (9.0, 30.0)                               | 13.0 (8.0, 27.0)                                   | 15.0 (8.0,28.0)                                | 18.5 (8.0, 28.5)                                   |
| <b>Baseline CRP Median (IQR)</b>                       | 5.0 (3.0,11.0)                                 | 6.5 (3.0,13.0)                                     | 6.0, (3.0,13.0)                                | 6.0 (3.0, 11.0)                                    | 5.0 (3.0, 12.0)                                | 6.0 (3.0, 12.0)                                    |
| <b>Medications, n (%)</b>                              |                                                |                                                    |                                                |                                                    |                                                |                                                    |
| Biologic DMARD                                         | 30 (19.4)                                      | 22 (24.2)                                          | 35 (20.2)                                      | 17 (24.6)                                          | 65 (19.8)                                      | 39 (24.4)                                          |
| Combination non-biologic DMARD                         | 46 (29.7)                                      | 26 (28.6)                                          | 42 (24.3)                                      | 11 (15.9)                                          | 42 (26.8)                                      | 37 (23.1)                                          |
| Single non-biologic DMARD                              | 66 (42.6)                                      | 37 (40.7)                                          | 85 (49.1)                                      | 33 (47.8)                                          | 85 (46.0)                                      | 70 (43.8)                                          |
| Other medications                                      | 13 (8.4)                                       | 6 (6.6)                                            | 11 (6.4)                                       | 8 (11.6)                                           | 11 (3.4)                                       | 14 (8.8)                                           |
| <b>Baseline MHQ hand function, Mean (SD)</b>           | 53.9 (15.1)                                    | 48.9 (14.8)                                        | 54.1 (15.6)                                    | 47.0 (17.4)                                        | 54.0 (15.4)                                    | 48.1 (15.9)                                        |
| <b>Baseline SF12 physical summary score, Mean (SD)</b> | 35.4 (9.7)                                     | 31.1 (9.4)                                         | 35.4 (9.7)                                     | 32.1 (8.5)                                         | 35.4 (9.7)                                     | 31.5 (9.0)                                         |
| <b>Baseline SF12 mental summary score,</b>             | 49.7 (10.5)                                    | 45.5 (10.7)                                        | 50.4 (10.4)                                    | 45.1 (11.7)                                        | 50.1 (10.4)                                    | 45.3 (11.1)                                        |

|                                                                                 |             |             |             |             |             |             |
|---------------------------------------------------------------------------------|-------------|-------------|-------------|-------------|-------------|-------------|
| <b>Mean (SD)</b>                                                                |             |             |             |             |             |             |
| <b>Baseline EQ5D health state, Mean (SD)</b>                                    | 0.6 (0.3)   | 0.5 (0.3)   | 0.6 (0.2)   | 0.5 (0.3)   | 0.6 (0.3)   | 0.5 (0.3)   |
| <b>Baseline pain troublesomeness score, Mean (SD)</b>                           | 43.1 (20.5) | 50.9 (24.2) | 46.0 (21.1) | 54.6 (21.6) | 44.6 (20.9) | 52.5 (23.1) |
| <b>Baseline self-efficacy – confidence to manage their condition, Mean (SD)</b> | 69.5 (18.2) | 62.5 (23.0) | 71.3 (17.7) | 62.2 (21.0) | 70.5 (17.9) | 62.4 (22.1) |
| <b>Participant reported frequency of hand exercises at 4 months, n (%)</b>      |             |             |             |             |             |             |
| <b>At least 3 times a week</b>                                                  | 107 (71.8)  | 44 (67.7)   | 80 (48.2)   | 25 (45.5)   | 187 (59.4)  | 69 (57.5)   |
| <b>Less than 3 times a week</b>                                                 | 26 (17.5)   | 11 (16.9)   | 36 (21.7)   | 5 (9.1)     | 62 (19.7)   | 16 (13.3)   |
| <b>No exercises</b>                                                             | 16 (10.7)   | 10 (15.4)   | 50 (30.1)   | 25 (45.5)   | 66 (21.0)   | 35 (29.2)   |
| <b>Participant reported frequency of hand exercises at 12 months, n (%)</b>     |             |             |             |             |             |             |
| <b>At least 3 times a week</b>                                                  | 61 (40.4)   | 18 (33.3)   | 66 (39.1)   | 18 (38.3)   | 127 (39.7)  | 36 (35.6)   |
| <b>Less than 3 times a week</b>                                                 | 53 (35.1)   | 12 (22.2)   | 35 (20.7)   | 9 (19.1)    | 88 (27.5)   | 21 (20.8)   |
| <b>No exercises</b>                                                             | 37 (24.5)   | 24 (44.4)   | 68 (40.2)   | 20 (42.6)   | 105 (32.8)  | 44 (43.6)   |
| <b>Change in MHQ hand function baseline to 12 months, Mean (SD)</b>             | 7.2 (13.6)  | 9.8 (16.8)  | 3.2 (16.0)  | 4.8 (16.3)  | 5.1 (15.0)  | 7.5 (16.7)  |
| <b>Change in SF12 physical summary score baseline to 12 months, Mean (SD)</b>   | 0.8 (7.2)   | 2.3 (6.3)   | -0.1 (7.6)  | 0.5 (6.7)   | 0.3 (7.5)   | 1.5 (6.5)   |
| <b>Change in SF12 mental summary score baseline to 12 months, Mean (SD)</b>     | 2.1 (9.9)   | 2.4 (12.4)  | 0.2 (9.5)   | 1.1 (10.8)  | 1.1 (9.7)   | 1.8 (11.7)  |
| <b>Change in EQ5D health state baseline to 12 months, Mean (SD)</b>             | 0.0 (0.2)   | 0.0 (0.2)   | 0.0 (0.2)   | 0.0 (0.3)   | 0.0 (0.2)   | 0.0 (0.3)   |

## Intervention adherence

Exercise programme participants reported substantially reducing their frequency of hand exercises over time with 71.4% reporting that they exercised 3 times per week at 4 months and only 31.4% at the extended follow-up (Table 2). They had reported performing hand exercises for their RA more frequently than best practice usual care participants at both the 4 and 12 months follow-up. At extended follow-up there was no longer a clear difference between the two groups in their reports of hand exercises.

Table 2 Participant reported frequency of hand exercises for their RA [n(%)] for those that responded to the extended follow-up

|                                                         | 4 Months   |                    | 12 Months  |                    | Extended follow-up |                    |
|---------------------------------------------------------|------------|--------------------|------------|--------------------|--------------------|--------------------|
|                                                         | Usual Care | Exercise programme | Usual Care | Exercise programme | Usual Care         | Exercise programme |
| <b>Participant reported frequency of hand exercises</b> |            |                    |            |                    |                    |                    |
| <b>At least 3 times a week</b>                          | 80 (48.2)  | 107 (71.8)         | 66 (39.1)  | 61 (40.4)          | 60 (34.9)          | 48 (31.4)          |
| <b>Less than 3 times a week</b>                         | 36 (21.7)  | 26 (17.5)          | 35 (20.7)  | 53 (35.1)          | 38 (22.1)          | 48 (31.4)          |
| <b>No exercises</b>                                     | 50 (30.1)  | 16 (10.7)          | 68 (40.2)  | 39 (24.5)          | 74 (43.0)          | 57 (37.3)          |
| <b>Not answered</b>                                     | 3          | 3                  | 2          | 2                  | 1                  | 2                  |
| <b>P trend (Wilcoxon)</b>                               | <0.0001    |                    | 0.0884     |                    | 0.7715             |                    |

### Primary outcome – hand function

Figure 2 and Table 3 shows the change in MHQ hand function subscale scores over time for those completing the extended follow-up. Best practice usual care resulted in small but statistically significant improvements in hand function at 4 and 12 months, in comparison to baseline values. However, the within group difference between baseline and extended follow-up was not statistically significant [Mean MHQ hand function subscale score at baseline = 54.1 (SD15.65); extended follow-up = 56.1 (SD18.85);  $p=0.1122$ ].

**Figure 2 Mean change from baseline over time for the primary and secondary outcomes for those who responded to the extended follow-up. Error bars represent the standard error. For the number of participants providing data for each outcome at each time point please refer to Table 3.**

Table 3 Estimates of effect in primary outcome and patient reported secondary outcome measures for those who responded to the extended follow-up.

|                                       | Mean change from Baseline (95% CI) |                       | Mean treatment difference<br>(95% CI) | P value | Number of participants<br>confirmed |
|---------------------------------------|------------------------------------|-----------------------|---------------------------------------|---------|-------------------------------------|
|                                       | Usual Care                         | Exercise programme    |                                       |         |                                     |
| <b>MHQ</b>                            |                                    |                       |                                       |         |                                     |
| <b>Overall hand function</b>          |                                    |                       |                                       |         |                                     |
| 4 Months                              | 3.27 (1.15 to 5.39)                | 9.27 (7.19 to 11.34)  | 6.24 (3.56 to 8.92)***                | <0.0001 | 320                                 |
| 12 Months                             | 3.19 (0.79 to 5.59)                | 7.18 (5.02 to 9.33)   | 3.91 (0.71 to 7.10)*                  | 0.0171  | 324                                 |
| Extended follow-up                    | 1.97 (-0.45 to 4.39)               | 3.76 (1.50 to 6.02)   | 1.52 (-1.71 to 4.76)                  | 0.3567  | 327                                 |
| <b>MHQ</b>                            |                                    |                       |                                       |         |                                     |
| <b>ADL (both hands)</b>               |                                    |                       |                                       |         |                                     |
| 4 Months                              | 3.37 (0.94 to 5.79)                | 8.29 (5.61 to 10.96)  | 5.07 (1.73 to 8.42)**                 | 0.0032  | 319                                 |
| 12 Months                             | 2.53 (-0.12 to 5.18)               | 5.34 (2.71 to 7.97)   | 2.83 (-0.90 to 6.56)                  | 0.1375  | 323                                 |
| Extended follow-up                    | 2.34 (0.03 to 4.66)                | 3.15 (0.30 to 6.01)   | 0.72 (-2.88 to 4.32)                  | 0.6948  | 324                                 |
| <b>MHQ</b>                            |                                    |                       |                                       |         |                                     |
| <b>Work</b>                           |                                    |                       |                                       |         |                                     |
| 4 Months                              | 4.91 (1.91 to 7.91)                | 8.26 (5.47 to 11.04)  | 3.04 (-0.96 to 7.04)                  | 0.1370  | 316                                 |
| 12 Months                             | 2.97 (-0.05 to 5.99)               | 7.70 (4.73 to 10.68)  | 4.44 (0.30 to 8.57)*                  | 0.0363  | 323                                 |
| Extended follow-up                    | 5.81 (2.97 to 8.65)                | 7.76 (4.67 to 10.84)  | 2.06 (-2.10 to 6.22)                  | 0.3318  | 315                                 |
| <b>SF 12</b>                          |                                    |                       |                                       |         |                                     |
| <b>Mental Component Score (MCS)</b>   |                                    |                       |                                       |         |                                     |
| 4 Months                              | 0.70 (-0.62 to 2.02)               | 1.09(-0.18 to 2.37)   | 0.51 (-1.16 to 2.18)                  | 0.5488  | 319                                 |
| 12 Months                             | 0.21 (-1.21 to 1.64)               | 2.12 (0.54 to 3.69)   | 1.63 (-0.22 to 3.49)                  | 0.0857  | 322                                 |
| Extended follow-up                    | 0.21 (-1.23 to 1.66)               | 0.27 (-1.25 to 1.78)  | 0.22 (-1.71 to 2.15)                  | 0.8252  | 326                                 |
| <b>SF 12</b>                          |                                    |                       |                                       |         |                                     |
| <b>Physical Component Score (PCS)</b> |                                    |                       |                                       |         |                                     |
| 4 Months                              | 0.62 (-0.39 to 1.63)               | 1.84 (0.65 to 3.02)   | 1.37 (-0.12 to 2.86)                  | 0.0719  | 319                                 |
| 12 Months                             | -0.09 (-1.24 to 1.06)              | 0.76 (-0.39 to 1.92)  | 0.72 (-0.79 to 2.23)                  | 0.3519  | 321                                 |
| Extended follow-up                    | -0.51 (-1.66 to 0.64)              | 0.19 (-1.16 to 1.54)  | 0.50 (-1.24 to 2.25)                  | 0.5720  | 326                                 |
| <b>EQ-5D Health state</b>             |                                    |                       |                                       |         |                                     |
| 4 Months                              | 0.0 (-0.03 to 0.04)                | 0.06 (0.02,0.09)      | 0.03 (-0.01 to 0.07)                  | 0.1654  | 319                                 |
| 12 Months                             | 0.02 (-0.02 to 0.05)               | 0.04 (0.00 to 0.07)   | 0.00 (-0.04 to 0.05)                  | 0.8239  | 322                                 |
| Extended follow-up                    | -0.01 (-0.05 to 0.02)              | -0.01 (-0.05 to 0.03) | -0.01 (-0.06 to 0.04)                 | 0.6893  | 324                                 |

|                                                             |                        |                        |                       |        |     |
|-------------------------------------------------------------|------------------------|------------------------|-----------------------|--------|-----|
| <b>Pain troublesomeness score<sup>†</sup></b>               |                        |                        |                       |        |     |
| <b>4 Months</b>                                             | -4.79 (-7.76 to -1.82) | -5.57 (-8.25 to -2.90) | -2.51 (-6.22 to 1.21) | 0.1872 | 315 |
| <b>12 Months</b>                                            | -4.68 (-7.83 to -1.53) | -5.03 (-8.16 to -1.90) | -1.58 (-5.65 to 2.48) | 0.4454 | 322 |
| <b>Extended follow-up</b>                                   | -3.79 (-6.93 to -0.64) | 0.20 (-2.98 to 3.38)   | 3.23 (-0.83 to 7.28)  | 0.1199 | 326 |
| <b>Self-efficacy – confidence to manage their condition</b> |                        |                        |                       |        |     |
| <b>4 Months</b>                                             | 2.38 (-0.15 to 4.62)   | 6.58 (3.74 to 9.42)    | 3.41 (0.5 to 6.29)*   | 0.0209 | 319 |
| <b>12 Months</b>                                            | 1.30 (-1.32 to 3.92)   | 5.46 (2.29 to 8.62)    | 3.19 (0.71 to 6.98)   | 0.1113 | 321 |
| <b>Extended follow-up</b>                                   | 0.22 (-2.34 to 2.78)   | 2.96 (0.03 to 5.90)    | 2.30 (-1.20 to 5.79)  | 0.1988 | 323 |

\*\*\*p<0.001; \*\* p<0.01; \*p<0.05; † Higher score = more pain

1  
2  
3 Exercise resulted in substantial improvements from baseline, with the peak effect at 4 months. For  
4 both 4 and 12 months differences between the exercise and best practice usual care group were  
5 statistically and clinically significant. By the extended follow-up time point the exercise intervention  
6 was still associated with a significant within group improvement in hand function in comparison to  
7 baseline [Mean MHQ hand function subscale score at baseline =53.9 (SD15.1); extended follow-up =  
8 57.7 (SD18.04); p=0.0014]. However, the difference between exercise and best practice usual care  
9 interventions was no longer statistically significant (Table 3).  
10  
11  
12  
13

## 14 **Secondary outcomes**

### 15 MHQ ADL and MHQ work subscales

16  
17  
18 Significant within group differences were observed in both groups for the MHQ ADL and MHQ work  
19 subscales at the extended follow-up compared to baseline (p<0.05 and P<0.001 for best practice  
20 usual care and the exercise arms respectively). Greater improvement from baseline was seen in the  
21 exercise arm (Figure 2 and Table 3).  
22  
23  
24  
25  
26

27  
28 There was a statistically significant between group difference in the MHQ ADL subscale at 4 and 12  
29 months and the MHQ work subscale at 12 months favouring the exercise arm but this difference was  
30 no longer significant at the extended follow-up.  
31  
32

### 33 Health-related Quality of Life (SF-12 and EQ-5D)

34  
35  
36 There were no observable within group differences or between group differences at any follow-up  
37 time point as measured by the SF-12 or the EQ-5D (Figure 2 and Table 3).  
38  
39

### 40 Pain troublesomeness

41  
42  
43 There were statistically significant within group changes at the 4 and 12 months follow-up with both  
44 groups reporting less pain compared to baseline and this continued in the best practice usual care  
45 arm at extended follow-up (p=0.0196). However, the pain scores reported at extended follow-up in  
46 the exercise arm were similar to baseline scores (p=0.9039).  
47  
48

49  
50 There was no statistically significant between group difference in pain troublesomeness scores at  
51 any follow-up time point (Figure 2 and Table 3).  
52  
53  
54  
55  
56  
57  
58  
59  
60



### Self-efficacy

At extended follow-up there was a significant within group change in self-efficacy observed in the exercise arm but not the best practice usual care arm. Participants in the exercise group reported higher self-efficacy scores compared to their baseline scores ( $p=0.0496$ ) but this was not the case for the best practice usual care ( $p=0.8675$ ).

Respondents in the exercise arm reported higher self-efficacy scores at 4 months follow-up compared to the best practice usual care group but this difference was diminished at 12 months and extended follow-up so the between group difference was no longer evident (Figure 2 and Table 3).

### Participant rated improvement

Participant rated improvement in the exercise arm were significantly higher at 4 and 12 months follow-up than the best practice usual care group but there was no difference between the two groups at the extended follow-up (Table 4).

Table 4 Patient reported secondary outcome measures [n (%)] for those that responded to the extended follow-up

|                                      | 4 Months   |                    | 12 Months  |                    | Extended follow-up |                    |
|--------------------------------------|------------|--------------------|------------|--------------------|--------------------|--------------------|
|                                      | Usual Care | Exercise programme | Usual Care | Exercise programme | Usual Care         | Exercise programme |
| <b>Participant rated improvement</b> |            |                    |            |                    |                    |                    |
| <b>Completely recovered</b>          | 1 (0.6)    | -                  | 2 (1.2)    | 1 (0.7)            | 1 (0.6)            | -                  |
| <b>Much improved</b>                 | 18 (10.8)  | 34 (22.8)          | 14 (8.2)   | 31 (20.5)          | 22 (12.8)          | 25 (16.3)          |
| <b>Slightly improved</b>             | 34 (20.4)  | 48 (32.2)          | 23 (13.5)  | 38 (25.2)          | 17 (9.9)           | 24 (15.7)          |
| <b>No change</b>                     | 65 (38.9)  | 45 (30.2)          | 69 (40.6)  | 47 (31.1)          | 75 (43.6)          | 58 (37.9)          |
| <b>Slightly worsened</b>             | 41 (24.6)  | 17 (11.4)          | 49 (28.8)  | 22 (14.6)          | 41 (23.8)          | 35 (22.9)          |
| <b>Much worsened</b>                 | 8 (4.8)    | 5 (3.4)            | 12 (7.1)   | 9 (6.0)            | 15 (8.7)           | 7 (4.6)            |
| <b>Vastly worsened</b>               | -          | -                  | 1 (0.6)    | 3 (2.0)            | 1 (0.6)            | 4 (2.6)            |
| <b>P trend (Wilcoxon)</b>            | <0.0001    |                    | <0.0001    |                    | 0.2018             |                    |

### Multiple imputation

Multiple imputation was used to evaluate the impact of missing data and the estimate of treatment difference from baseline to extended follow-up was 1.75 (-1.20, 4.70),  $p=0.2433$ . This is similar to the non-imputed analysis suggesting that missing data was not a major influence on the study findings.

## DISCUSSION

We have evaluated the long term outcomes of an individually tailored exercise programme compared to best practice usual care for adults with RA of the hand. Between group differences had

1  
2  
3 diminished over an average follow-up time of 26 months but generally functional scores favoured  
4 the exercise group. Both groups had improved hand function compared to baseline but this was  
5 only statistically significant in the exercise group. We interpret this to mean that although functional  
6 improvements due to the exercises had reduced, they had not diminished completely. Exercise arm  
7 participants completed treatment with their therapist approximately 3 months after randomisation  
8 so for some participants it had been 2 years since attending treatment. Therefore, it is very  
9 encouraging that some benefit still persisted. We aimed to estimate exercise adherence beyond the  
10 supervised period and the data shows that by the extended follow-up many participants in the  
11 exercise arm were no longer exercising as intended. RA is a progressive disease so regular exercise  
12 of sufficient intensity is needed to maintain muscle strength. It is likely that participants were no  
13 longer achieving a sufficient dose to maintain functional improvements.  
14  
15  
16  
17  
18  
19  
20

21 Another study of upper limb exercises demonstrated a similar reduction of benefit over time where  
22 gains observed at 12 weeks were no longer evident at 26 weeks follow-up[26] with an assumption it  
23 was due to reduced adherence but this data was not collected.  
24  
25  
26

27 Another proposed mechanism by which the intervention improved function was by bolstering self-  
28 efficacy. This effect had also diminished which may be due to the fact it had been 2 years since  
29 attending treatment.  
30  
31  
32

33 One outcome favoured the best practice usual care (pain troublesomeness scores). There was no  
34 between group differences but the best practice usual care group had a small but statistically  
35 significant reduction in pain compared to baseline unlike the exercise group. However, the reduction  
36 in pain was small and we are confident the exercises did not increase pain while improving function.  
37 There was no difference in adverse events reported[11] and we conclude that the exercise  
38 programme is safe.  
39  
40  
41  
42  
43

#### 44 Clinical implications and further research

45  
46 The SARAH exercise programme is an effective adjunct to the medical management of RA for  
47 patients with hand problems, but the benefit from the exercise programme did reduce over time as  
48 participants reported doing less exercises. These findings raise important questions regarding how  
49 patients might be supported to exercise long term which is probably necessary to maintain  
50 functional gains.  
51  
52  
53  
54

55 Further research is needed to establish how ongoing support could be provided. Patients with RA are  
56 seen frequently in rheumatology outpatient clinics with the National Institute for Health and Care  
57  
58  
59  
60

1  
2  
3 Excellence (NICE) recommending annual reviews for patients with RA[27]. Staff could monitor  
4 patient's exercise participation during these appointments. However, there is uncertainty amongst  
5 health professionals about providing advice about exercise to patients with RA[28, 29]. Specialist  
6 rheumatology nurses play an important role in monitoring and supporting patients, yet, EULAR  
7 recommendations for specialist rheumatology nurses do not mention exercise[30]. There is a need  
8 to educate health professionals and patients about the importance of regular exercise. It is safe for  
9 patients with RA to exercise[26, 31] and health professionals need to be confident to advise on  
10 exercise regimes, referring to therapists when needed. Patients with RA have to continually modify  
11 their treatment in response to changes in their condition. This also applies to exercise which  
12 presents another challenge. The SARAH programme is manualised, with clear instructions for  
13 progressing/regressing exercises allowing patients to modify exercises when needed. Participant  
14 feedback was that this was easy to follow[12] so these types of resources could be made available  
15 to health professionals and patients to help patients to exercise regularly.  
16  
17  
18  
19  
20  
21  
22  
23

#### 24 25 Methodological limitations

26  
27 The response rate was lower than the main study. This was not unexpected as this follow-up was not  
28 planned at the outset of the study so participants were unaware they would receive the postal  
29 questionnaire. We only contacted participants by post so as not to place undue pressure on them to  
30 respond and only phoned those who requested to complete the questionnaire by phone. As a  
31 consequence, the analysis is underpowered to detect a difference in the primary and secondary  
32 outcomes. Loss to follow-up could introduce bias and there were some differences in responders  
33 and non-responders, but these were equal across treatment groups. Most notably non-responders  
34 had poorer hand function at baseline which may have influenced their outcomes. Non-responders  
35 also reported lower levels of exercise adherence at earlier follow-up especially in the exercise arm.  
36 Multiple imputation techniques estimated the effect of missing data and the results were largely  
37 similar indicating that missing data did not overly influence the findings. Overall, we are confident  
38 that the participants providing data were a good representation of the total cohort.  
39  
40  
41  
42  
43  
44  
45  
46

47  
48 In conclusion, a hand exercise programme is an effective adjunct to current drug management to  
49 improve hand function. Participants in the exercise group had improved hand function compared to  
50 baseline more than 2 years after randomisation. Hand function had reduced over time which  
51 coincided with a reduction in hand exercises highlighting the importance of promoting long term  
52 exercise adherence amongst patients with RA.  
53  
54  
55  
56  
57  
58  
59  
60

## ACKNOWLEDGMENT AND AFFILIATIONS

*Collaborating NHS sites (names as of time of participation):*

Basingstoke and North Hampshire Hospitals NHS Foundation Trust (North Hampshire Hospital), Derby Hospitals NHS Foundation Trust (Royal Derby Hospital), Dorset Primary Care Trust (Victoria Hospital), George Eliot Hospital NHS Trust (George Eliot Hospital), Heart of England NHS Foundation Trust (Solihull Hospital), Nuffield Orthopaedic Centre NHS Trust (Nuffield Orthopaedic Centre), Poole Hospital NHS Foundation Trust (Poole General Hospital), Portsmouth Hospitals NHS Trust (Queen Alexandra Hospital), Royal Bournemouth NHS Foundation Trust (Christchurch Hospital), Royal National Hospital for Rheumatic Diseases NHS Foundation Trust (Bath Royal National Hospital for Rheumatic Diseases), South Warwickshire General Hospitals NHS Trust (Warwick Hospital and Stratford Upon Avon Hospital), Sussex Community NHS Trust (Bognor Regis War Memorial Hospital), Winchester and Eastleigh Health Care Trust (Royal Hampshire County Hospital), Worcestershire Acute Hospitals NHS Trust (Worcestershire Royal Hospital; Alexandra Hospital, Redditch; Kidderminster Hospital and Treatment Centre), Wrightington, Wigan and Leigh NHS Foundation Trust (Wrightington Hospital), University Hospitals Coventry & Warwickshire (University Hospital (Walsgrave site) and Rugby St Cross Hospital), University Hospitals of Leicester NHS Trust (Leicester Royal Infirmary and Leicester General Hospital).

*SARAH Trial team*

Chief Investigator: Prof SE Lamb

Co-investigators: Dr J Adams, Prof MR Underwood, C McConkey, Dr J Lord, Prof A Rahman

Trial lead: Dr MA Williams

Trial co-ordination/Administration: Dr S Dosanjh, S Lowe, A Campbell, L Rattigan

Research Fellows/Associates: P Heine, Dr EM Williamson, V Nichols

Trial statistician: C McConkey

Health economists: Dr J Lord, C Crossan, Dr M Dritsaki, Dr M Glover

*Research Clinicians (recruitment and data collection):*

Olivia Neely, Catherine Gibson, Karen Hotchkiss, Frances Chilton, Jessica Thrush, Catherine Minns-Lowe, Ann Birch, Linda Webber, Nicola Clague, Sue Kennedy, Kevin Spear, Sandi Derham, Dr Jenny

1  
2  
3 Lewis, Sarah Bradley, Julie Cottrell, Paula White, Carole Frosdick, Jennifer Wilson, Nicola Bassett-  
4 Burr, Maggie Walsh.  
5  
6

7 *Intervention therapists (delivery of treatments):*

8  
9 Lynda Myshrall, Jane Tooby, Cherry Steinberg, Mary Grant, Roslyn Handley, Fiona Jones, Clare  
10 Pheasant, Kate Hynes, Sue Kelly (UHCW NHS Trust); Joanne Newbold, Sally Thurgarland (George  
11 Eliot Hospital NHS Trust); Jane Dickenson, Lucy Mann (South Warwickshire Hospital NHS Trust);  
12 Alison Hinton, Rachel Chapman, Sunita Farmah, Collette James, Janice Wiltshire, Jane Simons  
13 (Worcester Acute Hospitals NHS Trust); Jane Martindale, Susan Hesketh, Alison Gerrard  
14 (Wrightington, Wigan & Leigh NHS Trust); Kirsty Bancroft, Corinna Cheng (Poole Hospital NHS Trust);  
15 Caroline Wood (Royal Bournemouth NHS Trust); Lisa Small, Karen Coales, Helen Ibbunson, Anne  
16 Bonsall (Bath Royal National Hospital for Rheumatic Diseases); Caroline Mountain, Jonathan  
17 Gibbons, Esther Mavurah, Hannah Susans (Portsmouth Hospitals NHS Trust); Nicola Spear, Becky  
18 Shaylor, Leon Ghulam (Basingstoke & North Hampshire Hospital NHS Trust); Sarah Wastell (Dorset  
19 NHS Trust); Christina MacLeod, Sapphire Patterson, Jane Vadher (Winchester & Eastleigh Healthcare  
20 NHS Trust); Karen Barker, Sue Gosling, Lizelle Sander-Danby, Jon Room, Aimee Fenn, Anne Richards,  
21 Pam Clarke, Gill Rowbotham, Nicky Nolan (Nuffield Orthopaedic Centre NHS Trust); Lorraine Kendall  
22 (Bognor Regis War Memorial Hospital); Claire Charnley (Solihull Hospital); Laura Richardson, Kate  
23 Wakefield (Leicester Royal Infirmary); Victoria Jansen, Liz Radbourne, Julie Tougher (Royal Derby  
24 Hospital).  
25  
26  
27  
28  
29  
30  
31  
32  
33  
34

35 *Trial Steering Committee*

36  
37  
38 Prof Alison Hammond (Chair), Dr Chris Deighton, Dr Chris McCarthy, Prof Sallie Lamb, Dr Mark  
39 Williams, Mr John Wright (User representative)  
40  
41

42 *Data Monitoring Committee*

43  
44 Mr Ed Juszcak, Prof Paul Dieppe, Dr Helen Frost.  
45  
46  
47  
48  
49  
50  
51  
52  
53  
54  
55  
56  
57  
58  
59  
60

## CONTRIBUTING STATEMENT

EW: Design of the trial, data collection, interpretation of the data, drafting and revising of the paper, final approval of the version to be published.

CC: Data analysis and interpretation, drafting and revising the paper, final approval of the version to be published.

PH: Design of the study, data collection, interpretation of the data, revision of the paper, final approval of the version to be published.

SD: Trial administration, data collection, revision of the paper, final approval of the version to be published.

MW: Design of the study, data collection and interpretation of the data, revision of the paper, final approval of the version to be published.

SL: Conception and design of the trial, data analysis and interpretation, drafting and revising of the paper, final approval of the version to be published.

## COMPETING INTERESTS

None.

## FUNDING

The SARAH trial was funded by the National Institute of Health Research Health Technology Assessment Programme (NIHR HTA), project number 07/32/05.

This project benefited from facilities funded through Birmingham Science City Translational Medicine Clinical Research and Infrastructure Trials Platform, with support from Advantage West Midlands (AWM).

The preparation of this article was supported by the National Institute for Health Research (NIHR) Collaboration for Leadership in Applied Health Research and Care Oxford at Oxford Health NHS Foundation Trust. The views expressed are those of the author(s) and not necessarily those of the NHS, the NIHR or the Department of Health.

## DATA SHARING STATEMENT

1  
2  
3 The data is available on request from the Chief Investigator (Professor Sarah Lamb).  
4

## 5 6 **References**

- 7  
8 1. Symmons D, Turner G, Webb R, et al. The prevalence of rheumatoid arthritis in the United  
9 Kingdom: new estimates for a new century. *Rheumatology (Oxford)* 2002;41(7):793-800.  
10  
11 2. Deighton C, O'Mahony R, Tosh J, et al. Management of rheumatoid arthritis: summary of NICE  
12 guidance. *BMJ* 2009;338:b702.  
13  
14 3. Luqmani R, Hennell S, Estrach C, et al. British Society for Rheumatology and British Health  
15 Professionals in Rheumatology guideline for the management of rheumatoid arthritis (after the first  
16 2 years). *Rheumatology (Oxford)* 2009;48(4):436-9.  
17  
18 4. Brighton SW, Lubbe JE, van der Merwe CA. The effect of a long-term exercise programme on the  
19 rheumatoid hand. *British Journal of Rheumatology* 1993;32(5):392-5.  
20  
21 5. Buljina AI, Taljanovic MS, Avdic DM, et al. Physical and exercise therapy for treatment of the  
22 rheumatoid hand. *Arthritis & Rheumatism* 2001;45(4):392-7.  
23  
24 6. Dellhag B, Wollersjo I, Bjelle A. Effect of active hand exercise and wax bath treatment in  
25 rheumatoid arthritis patients. *Arthritis Care & Research* 1992;5(2):87-92.  
26  
27 7. Hoening H, Groff G, Pratt K, et al. A randomized controlled trial of home exercise on the  
28 rheumatoid hand. *Journal of Rheumatology* 1993;20(5):785-9.  
29  
30 8. O'Brien AV, Jones P, Mullis R, et al. Conservative hand therapy treatments in rheumatoid arthritis-  
31 a randomized controlled trial. *Rheumatology* 2006;45(5):577-83.  
32  
33 9. Adams J, Bridle C, Dosanjh S, et al. Strengthening and stretching for rheumatoid arthritis of the  
34 hand (SARAH): design of a randomised controlled trial of a hand and upper limb exercise  
35 intervention--ISRCTN89936343. *BMC Musculoskelet Disord* 2012;13:230.  
36  
37 10. Heine PJ, Williams MA, Williamson E, et al. Development and delivery of an exercise intervention  
38 for rheumatoid arthritis: strengthening and stretching for rheumatoid arthritis of the hand (SARAH)  
39 trial. *Physiotherapy* 2012;98(2):121-30.  
40  
41 11. Lamb SE, Williamson EM, Heine PJ, et al. Exercises to improve function of the rheumatoid hand  
42 (SARAH): a randomised controlled trial. *Lancet* 2015;385(9966):421-9.  
43  
44  
45  
46  
47  
48  
49  
50  
51  
52  
53  
54  
55  
56  
57  
58  
59  
60

- 1  
2  
3 12. Williams MA, Williamson EM, Heine PJ, et al. Strengthening And stretching for Rheumatoid  
4 Arthritis of the Hand (SARAH). A randomised controlled trial and economic evaluation. Health  
5 Technol Assess 2015;19(19):1-222.  
6  
7  
8  
9 13. Lemmey A, Marcora S, Chester K, et al. Effects of high-intensity resistance training in patients  
10 with rheumatoid arthritis: a randomized controlled trial. Arthritis Rheum 2009;61(12):1726-34.  
11  
12  
13 14. Swärdh E, Biguet G, Opava C. Views on exercise maintenance: variations among patients with  
14 rheumatoid arthritis. Phys Ther 2008;88(9):1049-60.  
15  
16  
17 15. Michie S, Rumsey N, Fussell A, et al. *Improving health: changing behaviour - NHS health trainer*  
18 *handbook*. Department of Health. Best Practice Guidance 9721.  
19  
20  
21 16. American College of Rheumatology. Guidelines for the management of rheumatoid arthritis:  
22 2002 Update. Arthritis Rheum 2002;46(2):328-46.  
23  
24  
25 17. Massy-Westropp N, Krishnan J, Ahern M. Comparing the AUSCAN Osteoarthritis Hand Index,  
26 Michigan Hand Outcomes Questionnaire, and Sequential Occupational Dexterity Assessment for  
27 patients with rheumatoid arthritis. J Rheumatol 2004;31(10):1996-2001.  
28  
29  
30 18. van der Giesen F, Nelissen R, Arendzen J, et al. Responsiveness of the Michigan Hand Outcomes  
31 Questionnaire--Dutch language version in patients with rheumatoid arthritis. Arch Phys Med Rehabil  
32 2008;89(6):1121-6.  
33  
34  
35 19. Adams J, Mullee M, Burridge J, et al. Responsiveness of self-report and therapist-rated upper  
36 extremity structural impairment and functional outcome measures in early rheumatoid arthritis.  
37 Arthritis Care Res (Hoboken) 2010;62(2):274-8.  
38  
39  
40 20. Parsons S, Carnes D, Pincus T, et al. Measuring troublesomeness of chronic pain by location. BMC  
41 Musculoskelet Disord 2006;7:34.  
42  
43  
44 21. Lorig K. *Outcome measures for health education and other health care interventions*. Thousand  
45 Oaks: Sage Publications, 1996.  
46  
47  
48 22. Brooks R. EuroQol: the current state of play. Health Policy 1996;37(1):53-72.  
49  
50  
51 23. Jenkinson C, Layte R. Development and testing of the UK SF-12 (short form health survey). J  
52 Health Serv Res Policy 1997;2(1):14-8.  
53  
54  
55 24. Fuchs HA, Brooks RH, Callahan LF, et al. A simplified twenty-eight-joint quantitative articular  
56 index in rheumatoid arthritis. Arthritis Rheum 1989;32(5):531-7.  
57  
58  
59  
60



- 1  
2  
3 25. Lineker S, Badley E, Hawker G, et al. Determining sensitivity to change in outcome measures used  
4 to evaluate hydrotherapy exercise programs for people with rheumatic diseases. *Arthritis Care Res*  
5 2000;13(1):62-5.  
6  
7  
8  
9 26. Manning VL, Hurley MV, Scott DL, et al. Education, self-management, and upper extremity  
10 exercise training in people with rheumatoid arthritis: a randomized controlled trial. *Arthritis Care*  
11 *Res (Hoboken)* 2014;66(2):217-27.  
12  
13  
14 27. National Institute of Health and Care Excellence. NICE clinical guideline 79: The management of  
15 rheumatoid arthritis in adults, 2009.  
16  
17  
18 28. Iversen MD, Fossel AH, Ayers K, et al. Predictors of exercise behavior in patients with rheumatoid  
19 arthritis 6 months following a visit with their rheumatologist. *Phys Ther* 2004;84(8):706-16.  
20  
21  
22 29. Hurkmans EJ, de Gucht V, Maes S, et al. Promoting physical activity in patients with rheumatoid  
23 arthritis: rheumatologists' and health professionals' practice and educational needs. *Clin Rheumatol*  
24 2011;30(12):1603-9.  
25  
26  
27  
28 30. van Eijk-Hustings Y, van Tubergen A, Boström C, et al. EULAR recommendations for the role of  
29 the nurse in the management of chronic inflammatory arthritis. *Ann Rheum Dis* 2012;71(1):13-9.  
30  
31  
32 31. Cooney JK, Law RJ, Matschke V, et al. Benefits of exercise in rheumatoid arthritis. *J Aging Res*  
33 2011;2011:Article Numer 681640.  
34  
35  
36  
37  
38  
39  
40  
41  
42  
43  
44  
45  
46  
47  
48  
49  
50  
51  
52  
53  
54  
55  
56  
57  
58  
59  
60

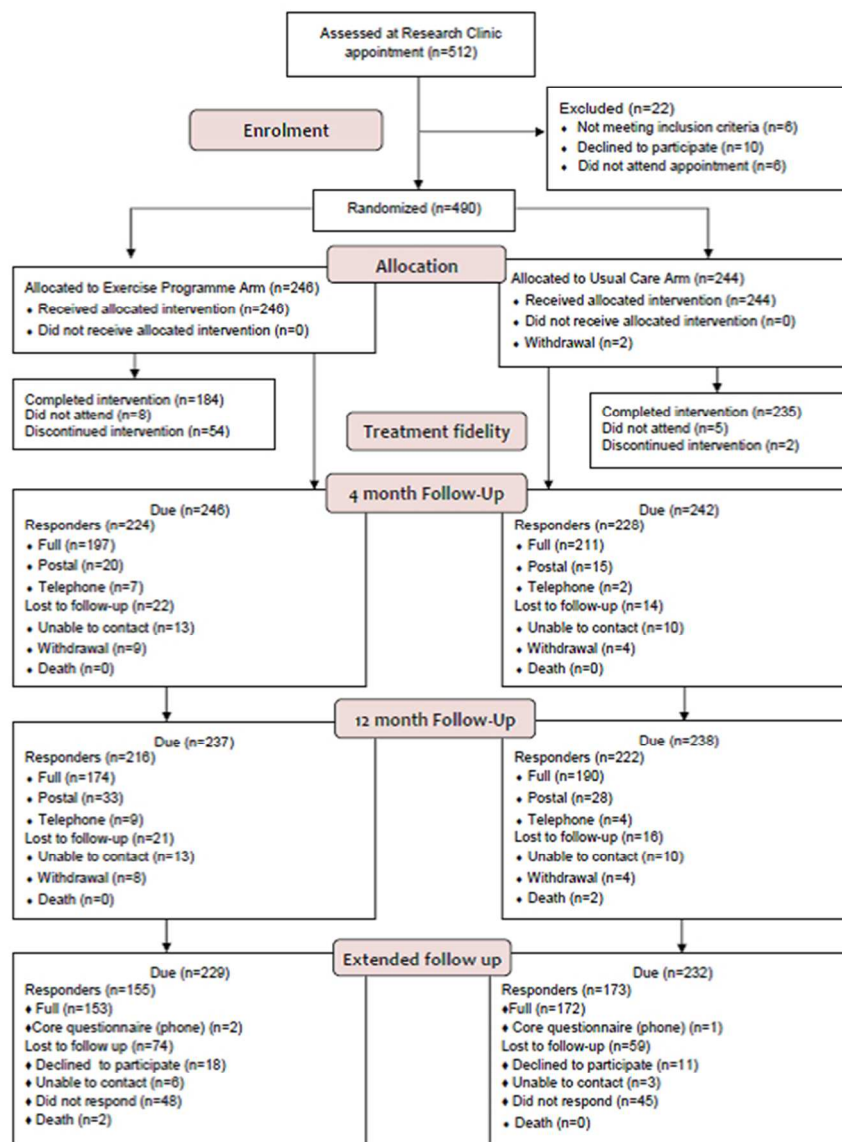

Figure 1 Consort Flow Chart

157x206mm (96 x 96 DPI)

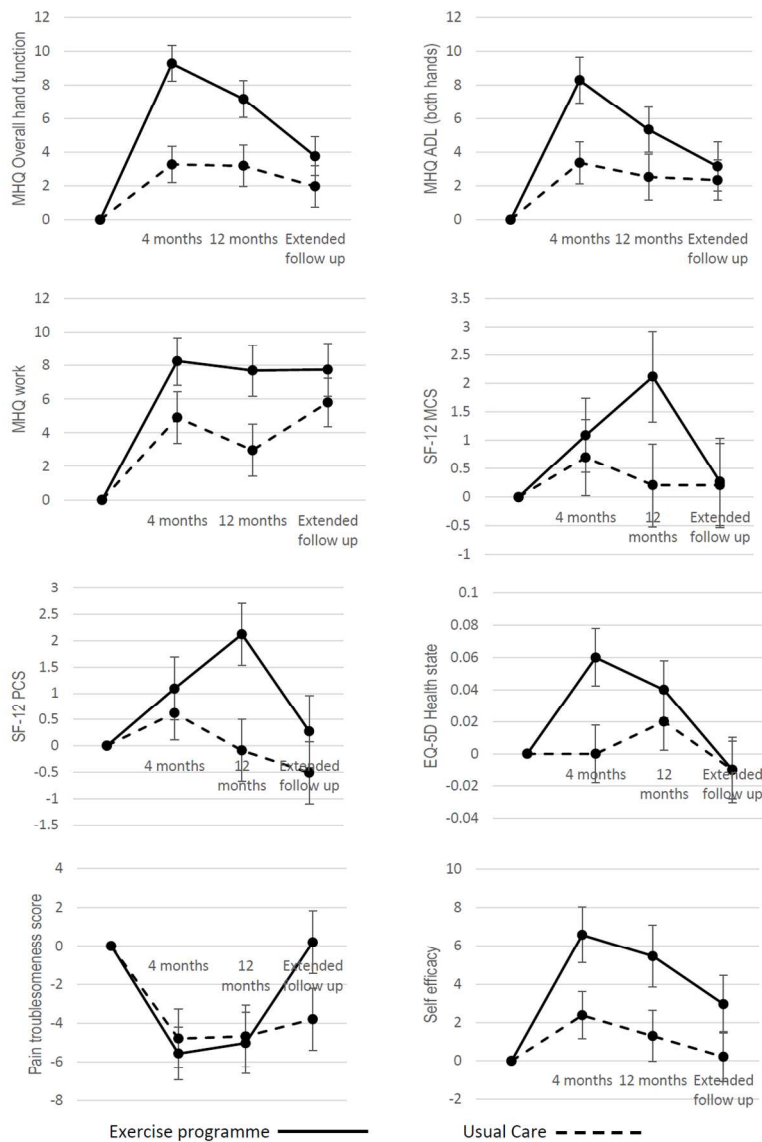

Figure 2 Mean change from baseline over time for the primary and secondary outcomes for those who responded to the extended follow-up.

333x491mm (96 x 96 DPI)

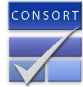

## CONSORT 2010 checklist of information to include when reporting a randomised trial\*

| Section/Topic                    | Item No | Checklist item                                                                                                                        | Reported on page No                           |
|----------------------------------|---------|---------------------------------------------------------------------------------------------------------------------------------------|-----------------------------------------------|
| <b>Title and abstract</b>        |         |                                                                                                                                       |                                               |
|                                  | 1a      | Identification as a randomised trial in the title                                                                                     | 1                                             |
|                                  | 1b      | Structured summary of trial design, methods, results, and conclusions (for specific guidance see CONSORT for abstracts)               | 2 Abstract                                    |
| <b>Introduction</b>              |         |                                                                                                                                       |                                               |
| Background and objectives        | 2a      | Scientific background and explanation of rationale                                                                                    | 4                                             |
|                                  | 2b      | Specific objectives or hypotheses                                                                                                     | 4                                             |
| <b>Methods</b>                   |         |                                                                                                                                       |                                               |
| Trial design                     | 3a      | Description of trial design (such as parallel, factorial) including allocation ratio                                                  | 4                                             |
|                                  | 3b      | Important changes to methods after trial commencement (such as eligibility criteria), with reasons                                    | N/A                                           |
| Participants                     | 4a      | Eligibility criteria for participants                                                                                                 | 4-5                                           |
|                                  | 4b      | Settings and locations where the data were collected                                                                                  | 4-5                                           |
| Interventions                    | 5       | The interventions for each group with sufficient details to allow replication, including how and when they were actually administered | 5 – reference provided for intervention paper |
| Outcomes                         | 6a      | Completely defined pre-specified primary and secondary outcome measures, including how and when they were assessed                    | 5-6                                           |
|                                  | 6b      | Any changes to trial outcomes after the trial commenced, with reasons                                                                 | N/A                                           |
| Sample size                      | 7a      | How sample size was determined                                                                                                        | 6                                             |
|                                  | 7b      | When applicable, explanation of any interim analyses and stopping guidelines                                                          | N/A                                           |
| <b>Randomisation:</b>            |         |                                                                                                                                       |                                               |
| Sequence generation              | 8a      | Method used to generate the random allocation sequence                                                                                | 6                                             |
|                                  | 8b      | Type of randomisation; details of any restriction (such as blocking and block size)                                                   | 6                                             |
| Allocation concealment mechanism | 9       |                                                                                                                                       | 6                                             |
| Implementation                   | 10      | Who generated the random allocation sequence, who enrolled participants, and who assigned participants to                             | 6                                             |

|                                                      |     |                                                                                                                                                   |                                                                     |
|------------------------------------------------------|-----|---------------------------------------------------------------------------------------------------------------------------------------------------|---------------------------------------------------------------------|
|                                                      |     | interventions                                                                                                                                     |                                                                     |
| Blinding                                             | 11a | If done, who was blinded after assignment to interventions (for example, participants, care providers, those assessing outcomes) and how          | 6                                                                   |
|                                                      | 11b | If relevant, description of the similarity of interventions                                                                                       | N/A                                                                 |
| Statistical methods                                  | 12a | Statistical methods used to compare groups for primary and secondary outcomes                                                                     | 6-7                                                                 |
|                                                      | 12b | Methods for additional analyses, such as subgroup analyses and adjusted analyses                                                                  | 6-7                                                                 |
| <b>Results</b>                                       |     |                                                                                                                                                   |                                                                     |
| Participant flow (a diagram is strongly recommended) | 13a | For each group, the numbers of participants who were randomly assigned, received intended treatment, and were analysed for the primary outcome    | 7, Figure 1, Tables 1-4                                             |
|                                                      | 13b | For each group, losses and exclusions after randomisation, together with reasons                                                                  | Figure 1                                                            |
| Recruitment                                          | 14a | Dates defining the periods of recruitment and follow-up                                                                                           | 5                                                                   |
|                                                      | 14b | Why the trial ended or was stopped                                                                                                                | N/A                                                                 |
| Baseline data                                        | 15  | A table showing baseline demographic and clinical characteristics for each group                                                                  | Table 1                                                             |
| Numbers analysed                                     | 16  | For each group, number of participants (denominator) included in each analysis and whether the analysis was by original assigned groups           | Tables 2-4<br>5                                                     |
| Outcomes and estimation                              | 17a | For each primary and secondary outcome, results for each group, and the estimated effect size and its precision (such as 95% confidence interval) | Tables 2-4                                                          |
|                                                      | 17b | For binary outcomes, presentation of both absolute and relative effect sizes is recommended                                                       | N/A                                                                 |
| Ancillary analyses                                   | 18  | Results of any other analyses performed, including subgroup analyses and adjusted analyses, distinguishing pre-specified from exploratory         | 16                                                                  |
| Harms                                                | 19  | All important harms or unintended effects in each group (for specific guidance see CONSORT for harms)                                             | 17 Adverse events reported in main trial paper – reference provided |
| <b>Discussion</b>                                    |     |                                                                                                                                                   |                                                                     |
| Limitations                                          | 20  | Trial limitations, addressing sources of potential bias, imprecision, and, if relevant, multiplicity of analyses                                  | 18                                                                  |
| Generalisability                                     | 21  | Generalisability (external validity, applicability) of the trial findings                                                                         | 18                                                                  |
| Interpretation                                       | 22  | Interpretation consistent with results, balancing benefits and harms, and considering other relevant evidence                                     | 16-18                                                               |

1  
2  
3  
4  
5  
6  
7  
8  
9  
10  
11  
12  
13  
14  
15  
16  
17  
18  
19  
20  
21  
22  
23  
24  
25  
26  
27  
28  
29  
30  
31  
32  
33  
34  
35  
36  
37  
38  
39  
40  
41  
42  
43  
44  
45  
46  
47  
48  
49

|              |    |                                                                                 |       |
|--------------|----|---------------------------------------------------------------------------------|-------|
| Registration | 23 | Registration number and name of trial registry                                  | 4     |
| Protocol     | 24 | Where the full trial protocol can be accessed, if available                     | 4     |
| Funding      | 25 | Sources of funding and other support (such as supply of drugs), role of funders | 20-21 |

\*We strongly recommend reading this statement in conjunction with the CONSORT 2010 Explanation and Elaboration for important clarifications on all the items. If relevant, we also recommend reading CONSORT extensions for cluster randomised trials, non-inferiority and equivalence trials, non-pharmacological treatments, herbal interventions, and pragmatic trials. Additional extensions are forthcoming: for those and for up to date references relevant to this checklist, see [www.consort-statement.org](http://www.consort-statement.org).

For peer review only

# BMJ Open

## Hand exercises for patients with rheumatoid arthritis – an extended follow-up of the SARAH randomised controlled trial

|                                 |                                                                                                                                                                                                                                                                                                                                                                                                                                                                                                                                                                                                                               |
|---------------------------------|-------------------------------------------------------------------------------------------------------------------------------------------------------------------------------------------------------------------------------------------------------------------------------------------------------------------------------------------------------------------------------------------------------------------------------------------------------------------------------------------------------------------------------------------------------------------------------------------------------------------------------|
| Journal:                        | <i>BMJ Open</i>                                                                                                                                                                                                                                                                                                                                                                                                                                                                                                                                                                                                               |
| Manuscript ID                   | bmjopen-2016-013121.R1                                                                                                                                                                                                                                                                                                                                                                                                                                                                                                                                                                                                        |
| Article Type:                   | Research                                                                                                                                                                                                                                                                                                                                                                                                                                                                                                                                                                                                                      |
| Date Submitted by the Author:   | 23-Nov-2016                                                                                                                                                                                                                                                                                                                                                                                                                                                                                                                                                                                                                   |
| Complete List of Authors:       | Williamson, Esther; University of Oxford, Nuffield Department of Orthopaedics, Rheumatology and Musculoskeletal Sciences<br>McConkey, Chris; University of Warwick Warwick Medical School, Clinical Trials Unit<br>Heine, Peter; University of Oxford, Nuffield Department of Orthopaedics, Rheumatology and Musculoskeletal Sciences<br>Dosanjh, Sukhdeep; University of Warwick Warwick Medical School, Clinical Trials Unit<br>Williams , Mark ; Oxford Brookes University, Sport and Health Sciences<br>Lamb, Sarah; University of Oxford, Nuffield Department of Orthopaedics, Rheumatology and Musculoskeletal Sciences |
| <b>Primary Subject Heading</b>: | Rheumatology                                                                                                                                                                                                                                                                                                                                                                                                                                                                                                                                                                                                                  |
| Secondary Subject Heading:      | Rehabilitation medicine, Sports and exercise medicine                                                                                                                                                                                                                                                                                                                                                                                                                                                                                                                                                                         |
| Keywords:                       | Exercise, Adherence, Rheumatoid Arthritis, Hand therapy                                                                                                                                                                                                                                                                                                                                                                                                                                                                                                                                                                       |
|                                 |                                                                                                                                                                                                                                                                                                                                                                                                                                                                                                                                                                                                                               |

SCHOLARONE™  
Manuscripts

1  
2  
3 Hand exercises for patients with rheumatoid arthritis – an extended follow-up of the SARAH  
4 randomised controlled trial  
5

6  
7 Corresponding author: Dr Esther Williamson  
8

9  
10 Postal Address: The Botnar Research Centre, Old Road, Headington, Oxford OX3 7LD  
11

12 Email: [Esther.williamson@ndorms.ox.ac.uk](mailto:Esther.williamson@ndorms.ox.ac.uk)  
13

14 Telephone: 01865 223120  
15

16  
17 Authors

18  
19 Esther Williamson, Centre for Rehabilitation Research, Nuffield Department of Orthopaedics,  
20 Rheumatology and Musculoskeletal Sciences, University of Oxford, Oxford, United Kingdom  
21

22  
23 Chris McConkey, Clinical Trials Unit, University of Warwick, Coventry, United Kingdom  
24

25  
26 Peter Heine, Centre for Rehabilitation Research, Nuffield Department of Orthopaedics,  
27 Rheumatology and Musculoskeletal Sciences, University of Oxford, Oxford, United Kingdom  
28

29  
30 Sukhdeep Dosanjh, Clinical Trials Unit, University of Warwick, Coventry, United Kingdom  
31

32  
33 Mark Williams, Department of Sports and Health Sciences, Oxford Brookes University, Oxford,  
34 United Kingdom  
35

36  
37 Sarah E Lamb, Centre for Rehabilitation Research, Nuffield Department of Orthopaedics,  
38 Rheumatology and Musculoskeletal Sciences, University of Oxford, Oxford, United Kingdom and  
39 Clinical Trials Unit, University of Warwick, Coventry, United Kingdom  
40

41  
42 Key words: exercise, adherence, rheumatoid arthritis, hand function  
43

44  
45 Word count: 2948  
46

47  
48 2 figures and 4 tables  
49  
50  
51  
52  
53  
54  
55  
56  
57  
58  
59  
60



1  
2  
3 Abstract

4  
5 Objectives:

6  
7  
8 The SARAH [Stretching And strengthening for Rheumatoid Arthritis of the Hand] randomised  
9 controlled trial evaluated the effectiveness of a hand exercise programme and demonstrated it was  
10 clinically and cost effective at 12 months. The aim of this extended follow-up was to evaluate the  
11 effects of the SARAH programme beyond 12 months.  
12  
13

14  
15 Methods:

16  
17 Using postal questionnaires, we collected the Michigan Hand Questionnaire (MHQ) hand function  
18 (primary outcome), ADL and work subscales, pain troublesomeness, self-efficacy and health related  
19 quality of life. All participants were asked how often they performed hand exercises for their  
20 rheumatoid arthritis. Mean difference in hand function scores were analysed by a linear model,  
21 adjusted for baseline score.  
22  
23  
24

25  
26 Results:

27  
28 Two thirds (n=328/490, 67%) of the original cohort provided data for the extended follow-up. The  
29 mean follow-up time was 26 months (range 19-40 months).  
30  
31

32  
33 There was no difference in change in hand function scores between the two groups at extended  
34 follow-up [mean difference (95%CI) 1.52 (-1.71 to 4.76)]. However, exercise group participants  
35 were still significantly improved compared to baseline (p=0.0014) unlike the best practice usual care  
36 group (p=0.1122). Self-reported performance of hand exercises had reduced substantially.  
37  
38  
39

40  
41 Conclusions:

42  
43 Participants undertaking the SARAH exercise programme had improved hand function compared to  
44 baseline more than 2 years after randomisation. This was not the case for the control group.  
45 However, scores were no longer statistically different between the groups indicating the effect of  
46 the programme had diminished over time. This reduction in hand function compared to earlier  
47 follow-up points coincided with a reduction in self-reported performance of hand exercises. Further  
48 intervention to promote long term adherence may be warranted.  
49  
50  
51  
52  
53  
54  
55  
56  
57  
58  
59  
60

**Strengths and limitations of this study**

There was a lack of evidence regarding the long term effectiveness of hand exercises for improving hand function in patients with rheumatoid arthritis (RA) beyond 12 months.

This paper reports on the extended follow up (average follow up of 26 months) of a trial evaluating the effectiveness of an individually tailored, progressive stretching and strengthening hand exercise programme for people with RA.

The benefits of the exercises evident at 12 months follow up had reduced but not completely diminished, however, so had adherence with the exercise programme.

This study highlights the importance of supporting patients with RA to maintain regular exercise.

The extended follow up was not planned at the start of the trial so the response rate is lower than that of the main trial.

## INTRODUCTION

Rheumatoid arthritis (RA) is the most common inflammatory polyarthritis[1]. Hand dysfunction is common and to address this, exercises are recommended[2, 3]. Recommendations include exercises for enhancing flexibility, muscle strength and managing functional impairments[2]. Limited evidence of the effectiveness of hand exercises for people with RA[4-8] led to the commissioning of the Stretching and Strengthening for Rheumatoid Arthritis of the Hand (SARAH) Trial (ISRCTN89936343)[9, 10]. The SARAH Trial demonstrated that an individually tailored, progressive stretching and strengthening hand exercise programme improved hand function and was cost-effective compared to usual care over a 12 month period[11, 12]. However, there remained a lack of evidence regarding the long term effect of hand exercises.

Adherence to any exercise programme is crucial[13]. Support provided by health professionals enhances adherence with exercises but adherence is challenging when unsupervised[14]. The SARAH exercise programme was prescribed by a physiotherapist or occupational therapist who provided a maximum of six supervisory sessions during a three month period. The median number of sessions actually attended by participants was 5 (interquartile range 5-6). During the sessions exercises were tailored to ensure maximal effect, and adherence promoted using a well-recognised behavioural framework[15]. It was intended that participants would carry out exercises daily at home during and beyond the supervised period.

The aim of the extended follow-up study was to estimate adherence to the intervention after the three month supervisory period, and the clinical effects of the SARAH exercise programme beyond 12 months.

## METHODS

### Study design

A pragmatic, multi-centre, randomised controlled trial carried out in 17 National Health Service (NHS) Hospitals in the United Kingdom[11] .

### Participants

Participants were adults ( $\geq 18$  years) with RA affecting their hands, who were either not on a disease-modifying anti-rheumatic drugs (DMARD) regime, or who had been on a stable DMARD regimen (including biologic agents) for three months or more. RA was defined using the American College of

1  
2  
3 Rheumatology criteria[16] . People who had upper limb surgery or fracture in the previous six  
4 months, were waiting for upper limb surgery or were pregnant were excluded.  
5  
6

### 7 **Study procedures**

8  
9 Potential participants were approached during clinic visits or from clinic records (October 2009 and  
10 May 2011) and provided with a written invitation and information sheet. A researcher arranged an  
11 appointment to discuss the trial, check eligibility, and if appropriate, complete baseline assessments  
12 and randomise participants. Follow-up data was collected 4 and 12 months after randomisation at  
13 face to face appointments. The extended follow-up (>12 months) was an addition to the original  
14 study protocol [9]. Approval was granted for all elements of the study by the Oxford C Multicenter  
15 Research Ethics Committee [REC reference 08/H0606/4] and by hospital Research and Development  
16 departments. Extended follow-up questionnaires were posted to all participants (unless they had  
17 withdrawn from the study or were deceased) between September 2012 and January 2013 so the  
18 time for extended follow-up varied between participants. Informed consent was provided by all  
19 participants. Participants who agreed to participate in the extended follow-up completed a response  
20 form indicating their consent and returned this with their questionnaire. Participants could request  
21 to complete the questionnaire over the phone. If participants did not respond to the extended  
22 follow-up invitation one reminder letter was sent.  
23  
24  
25  
26  
27  
28  
29  
30  
31

### 32 **Interventions**

33  
34 The control intervention was best practice usual care consisting of joint protection education, advice  
35 on whole body mobility exercises and, if appropriate, functional splinting delivered over a maximum  
36 of three appointments. Participants in the intervention arm received best practice usual care and an  
37 individually tailored exercise programme, in which moderate to high intensity strengthening and  
38 stretching exercises were prescribed. Therapists used supervisory sessions to provide advice, check  
39 tolerability, progress or regress exercises and promote adherence. Treatments are described in  
40 detail elsewhere [10].  
41  
42  
43  
44  
45

### 46 **Data collection**

47  
48  
49 Baseline measures

50  
51  
52 Measurements collect at baseline are described elsewhere[12]. These included demographics,  
53 Michigan Hand Outcome Questionnaire (MHQ) [17-19], pain troublesomeness[20], Arthritis Self-  
54 efficacy Scale[21], the EuroQol EQ5D[22], the 12 item short form health survey (SF-12)[23],  
55 impairment (grip strength, dexterity, hand and wrist range of motion and joint alignment),  
56  
57  
58  
59  
60

1  
2  
3 Erythrocyte Sedimentation Rate (ESR), C-Reactive Protein (CRP), modified tender and swollen joint  
4 count of the hands and wrist[24] and medication use.  
5  
6

#### 7 Outcome measures

8  
9 We reduced the number of outcomes included in the extended follow-up because of the postal  
10 mode of administration. Data collection was limited to self-reported measures and we were not able  
11 to include physical measures such as strength and dexterity that were measured at previous follow  
12 up time points. To reduce participant burden we did not use the whole Michigan Hand  
13 Questionnaire (MHQ) and excluded lengthy health resource use questions. Outcome measures for  
14 the main trial are described in detail elsewhere[11].  
15  
16  
17  
18

19 We collected the primary outcome (MHQ hand function subscale) for which scores ranged from 0 to  
20 100, with higher scores indicating better performance. Secondary outcomes were the activities of  
21 daily living (ADL) and work MHQ subscales, pain troublesomeness [20], participant-rated  
22 improvement, Arthritis Self-efficacy[21], the EuroQol EQ5D[22] and the 12 item short form health  
23 survey (SF-12)[23]. To assess adherence with the exercise programme, all participants were asked to  
24 report how often they performed hand exercises for their RA.  
25  
26  
27  
28  
29

#### 30 **Sample size estimates**

31 The SARAH trial was sized to detect a small to moderate effect size of 0.3 in the primary outcome at  
32 12 months. This was based on a previous smaller efficacy study of exercise that reported a  
33 standardised difference of 0.4 (8). We modified this effect downward (to 0.3) to account for the  
34 SARAH trial being a pragmatic multicenter trial and to reflect worthwhile effects found in other  
35 pragmatic studies of RA[25]. To show this difference with 80% power at the 5% significance level, we  
36 required data on a total of 352 participants (using SAS procedure GLMPOWER) for analysis. Allowing  
37 for a 25% loss to follow-up, at least 469 participants were needed.  
38  
39  
40  
41  
42  
43  
44

#### 45 **Randomisation**

46 We used a central telephone randomisation service at the Warwick Clinical Trials Unit.  
47 Randomisation was stratified by center, and used a variable block length. Allocation was computer-  
48 generated and revealed once the participant was registered into the trial. It was not possible to blind  
49 participants and therapists delivering treatments to treatment allocation but follow-up data was  
50 collected by blinded research staff.  
51  
52  
53  
54  
55  
56  
57  
58  
59  
60

## Statistical analysis

The analysis was intention to treat. Descriptive statistics were generated to compare people completing extended follow-up and those not, and the characteristics of randomised groups to identify any selection and retention biases. We only report earlier outcomes (baseline, 4 and 12 months) for those participants that took part in the extended follow-up. For all outcomes, we estimated within and between group differences at each time point (as well as overall) using a linear model. Estimates of treatment effect were reported as the mean difference and 95% confidence interval. All models were adjusted for baseline MHQ score and pre-randomisation drug regime (Biologic DMARDs, Combination non-biologic DMARDs, Single non-biologic DMARD, No DMARD). The inclusion of time-to-follow up allowed adjustment for variable amounts of follow-up, and an estimation of the impact of duration of follow-up on the treatment effect. Multiple imputation estimates for MHQ overall hand function were also calculated for the extended follow-up time-point and adjusted for hospital, age and sex. The multiple imputation took account of the MHQ hand function score for all time-points, and baseline data (age, CRP, ESR, SF12 physical and mental summary scores, pain troublesomeness, confidence, impairment measurements, and DMARD group).

Secondary outcome measures of change in pain, quality of life and self-efficacy were analysed in a similar manner. Patient rated improvement was compared using the Wilcoxon test. Report of current exercise performance was categorised as at least 3 times per week, less than 3 times per week and no exercise and was analysed using Pearson's chi-squared.

Statistical analyses used SAS V9.2 software (SAS Institute Inc., USA).

## RESULTS

### Characteristics of the sample

The baseline characteristics are given in Table 1. Just over two-thirds of the original cohort (n=328 67%) provided data (Figure 1). On average, participants completed the extended follow-up 26 months after randomisation, with no difference between the groups [exercise: median time of 25.8 months (IQR 22.0-30.8); best practice usual care: median time of 26 months (IQR 22.2-29.9); P=0.6522]. An analysis performed to see if the time of extended follow-up (which varied from 19 to 40 months after randomisation) was associated with outcome showed there was no significant time effect (p=0.1399).

1  
2  
3 The two groups at extended follow-up were similar in age, gender, disease duration and baseline EQ-  
4 5D scores.  
5  
6

7  
8 **Figure 1 – CONSORT Flow diagram**

9  
10 The characteristics of participants who did and did not respond to the extended follow-up are  
11 provided in Table 1. The average age of responders was 63.6 years (SD 10.9) and 75.6% (248/328)  
12 were women, which was similar to the demographic of the entire sample at baseline. However, non-  
13 responders had worse hand function at baseline than responders (scores 48.1 and 54.0 respectively).  
14 The proportion of participants reporting that they were performing hand exercises for their RA at  
15 earlier follow-up points was higher amongst responders compared to non-responders (Table 1)  
16 although the difference was not statistically significant ( $p=0.1323$  and  $p=0.2598$ ). Most notably, a  
17 greater proportion of non-responders in the exercise arm reported doing no exercise at 12 months  
18 compared to those who responded (44.4% versus 24.5% respectively;  $p=0.0488$ ).  
19  
20  
21  
22  
23  
24  
25  
26  
27  
28  
29  
30  
31  
32  
33  
34  
35  
36  
37  
38  
39  
40  
41  
42  
43  
44  
45  
46  
47  
48  
49  
50  
51  
52  
53  
54  
55  
56  
57  
58  
59  
60

Table 1 – Characteristics of participants completing and not completing the extended follow-up by arm

| Characteristic by arm                                  | Participants completing the extended follow-up | Participants not completing the extended follow-up | Participants completing the extended follow-up | Participants not completing the extended follow-up | Participants completing the extended follow-up | Participants not completing the extended follow-up |
|--------------------------------------------------------|------------------------------------------------|----------------------------------------------------|------------------------------------------------|----------------------------------------------------|------------------------------------------------|----------------------------------------------------|
| Study arm                                              | Exercise programme                             |                                                    | Usual Care                                     |                                                    | Combined                                       |                                                    |
| Age at randomisation, Mean (SD)                        | 62.9 (11.0)                                    | 58.6 (14.0)                                        | 64.3 (10.8)                                    | 61.5 (12.1)                                        | 63.6 (10.9)                                    | 59.8 (13.2)                                        |
| Sex, F (%)                                             | 77.4                                           | 74.7                                               | 74.0                                           | 81.2                                               | 75.6                                           | 77.5                                               |
| <b>Ethnic Origin, n (%)</b>                            |                                                |                                                    |                                                |                                                    |                                                |                                                    |
| White                                                  | 85 (93.4)                                      | 153 (98.7)                                         | 66 (95.7)                                      | 169 (98.3)                                         | 151 (93.4)                                     | 322 (98.5)                                         |
| Indian                                                 | 2 (2.2)                                        | 1 (0.7)                                            | -                                              | 2 (1.2)                                            | 2 (1.3)                                        | 3 (0.9)                                            |
| Pakistani                                              | -                                              | -                                                  | 1 (1.5)                                        | -                                                  | 1 (0.6)                                        | -                                                  |
| Mixed                                                  | 2 (2.2)                                        | 1 (0.7)                                            | 1 (1.5)                                        | -                                                  | 3 (1.9)                                        | 1 (0.3)                                            |
| Other                                                  | 2 (2.2)                                        | -                                                  | 1 (1.5)                                        | 1 (0.6)                                            | 3 (1.9)                                        | 1 (0.3)                                            |
| <b>Disease duration (years), Mean (SD)</b>             | 12.4 (10.8)                                    | 14.4 (10.4)                                        | 14.7 (12.5)                                    | 12.4 (10.7)                                        | 13.7 (11.8)                                    | 13.5 (10.6)                                        |
| <b>Baseline ESR Median (IQR)</b>                       | 13.0 (7.0, 26.0)                               | 21.0 (9.0,30.0)                                    | 17.0 (9.0, 30.0)                               | 13.0 (8.0, 27.0)                                   | 15.0 (8.0,28.0)                                | 18.5 (8.0, 28.5)                                   |
| <b>Baseline CRP Median (IQR)</b>                       | 5.0 (3.0,11.0)                                 | 6.5 (3.0,13.0)                                     | 6.0, (3.0,13.0)                                | 6.0 (3.0, 11.0)                                    | 5.0 (3.0, 12.0)                                | 6.0 (3.0, 12.0)                                    |
| <b>Medications, n (%)</b>                              |                                                |                                                    |                                                |                                                    |                                                |                                                    |
| Biologic DMARD                                         | 30 (19.4)                                      | 22 (24.2)                                          | 35 (20.2)                                      | 17 (24.6)                                          | 65 (19.8)                                      | 39 (24.4)                                          |
| Combination non-biologic DMARD                         | 46 (29.7)                                      | 26 (28.6)                                          | 42 (24.3)                                      | 11 (15.9)                                          | 42 (26.8)                                      | 37 (23.1)                                          |
| Single non-biologic DMARD                              | 66 (42.6)                                      | 37 (40.7)                                          | 85 (49.1)                                      | 33 (47.8)                                          | 85 (46.0)                                      | 70 (43.8)                                          |
| Other medications                                      | 13 (8.4)                                       | 6 (6.6)                                            | 11 (6.4)                                       | 8 (11.6)                                           | 11 (3.4)                                       | 14 (8.8)                                           |
| <b>Baseline MHQ hand function, Mean (SD)</b>           | 53.9 (15.1)                                    | 48.9 (14.8)                                        | 54.1 (15.6)                                    | 47.0 (17.4)                                        | 54.0 (15.4)                                    | 48.1 (15.9)                                        |
| <b>Baseline SF12 physical summary score, Mean (SD)</b> | 35.4 (9.7)                                     | 31.1 (9.4)                                         | 35.4 (9.7)                                     | 32.1 (8.5)                                         | 35.4 (9.7)                                     | 31.5 (9.0)                                         |
| <b>Baseline SF12 mental summary score,</b>             | 49.7 (10.5)                                    | 45.5 (10.7)                                        | 50.4 (10.4)                                    | 45.1 (11.7)                                        | 50.1 (10.4)                                    | 45.3 (11.1)                                        |



|                                                                                 |             |             |             |             |             |             |
|---------------------------------------------------------------------------------|-------------|-------------|-------------|-------------|-------------|-------------|
| <b>Mean (SD)</b>                                                                |             |             |             |             |             |             |
| <b>Baseline EQ5D health state, Mean (SD)</b>                                    | 0.6 (0.3)   | 0.5 (0.3)   | 0.6 (0.2)   | 0.5 (0.3)   | 0.6 (0.3)   | 0.5 (0.3)   |
| <b>Baseline pain troublesomeness score, Mean (SD)</b>                           | 43.1 (20.5) | 50.9 (24.2) | 46.0 (21.1) | 54.6 (21.6) | 44.6 (20.9) | 52.5 (23.1) |
| <b>Baseline self-efficacy – confidence to manage their condition, Mean (SD)</b> | 69.5 (18.2) | 62.5 (23.0) | 71.3 (17.7) | 62.2 (21.0) | 70.5 (17.9) | 62.4 (22.1) |
| <b>Participant reported frequency of hand exercises at 4 months, n (%)</b>      |             |             |             |             |             |             |
| <b>At least 3 times a week</b>                                                  | 107 (71.8)  | 44 (67.7)   | 80 (48.2)   | 25 (45.5)   | 187 (59.4)  | 69 (57.5)   |
| <b>Less than 3 times a week</b>                                                 | 26 (17.5)   | 11 (16.9)   | 36 (21.7)   | 5 (9.1)     | 62 (19.7)   | 16 (13.3)   |
| <b>No exercises</b>                                                             | 16 (10.7)   | 10 (15.4)   | 50 (30.1)   | 25 (45.5)   | 66 (21.0)   | 35 (29.2)   |
| <b>Participant reported frequency of hand exercises at 12 months, n (%)</b>     |             |             |             |             |             |             |
| <b>At least 3 times a week</b>                                                  | 61 (40.4)   | 18 (33.3)   | 66 (39.1)   | 18 (38.3)   | 127 (39.7)  | 36 (35.6)   |
| <b>Less than 3 times a week</b>                                                 | 53 (35.1)   | 12 (22.2)   | 35 (20.7)   | 9 (19.1)    | 88 (27.5)   | 21 (20.8)   |
| <b>No exercises</b>                                                             | 37 (24.5)   | 24 (44.4)   | 68 (40.2)   | 20 (42.6)   | 105 (32.8)  | 44 (43.6)   |
| <b>Change in MHQ hand function baseline to 12 months, Mean (SD)</b>             | 7.2 (13.6)  | 9.8 (16.8)  | 3.2 (16.0)  | 4.8 (16.3)  | 5.1 (15.0)  | 7.5 (16.7)  |
| <b>Change in SF12 physical summary score baseline to 12 months, Mean (SD)</b>   | 0.8 (7.2)   | 2.3 (6.3)   | -0.1 (7.6)  | 0.5 (6.7)   | 0.3 (7.5)   | 1.5 (6.5)   |
| <b>Change in SF12 mental summary score baseline to 12 months, Mean (SD)</b>     | 2.1 (9.9)   | 2.4 (12.4)  | 0.2 (9.5)   | 1.1 (10.8)  | 1.1 (9.7)   | 1.8 (11.7)  |
| <b>Change in EQ5D health state baseline to 12 months, Mean (SD)</b>             | 0.0 (0.2)   | 0.0 (0.2)   | 0.0 (0.2)   | 0.0 (0.3)   | 0.0 (0.2)   | 0.0 (0.3)   |

## Intervention adherence

Exercise programme participants reported substantially reducing their frequency of hand exercises over time with 71.4% reporting that they exercised 3 times per week at 4 months and only 31.4% at the extended follow-up (Table 2). They had reported performing hand exercises for their RA more frequently than best practice usual care participants at both the 4 and 12 months follow-up. At extended follow-up there was no longer a clear difference between the two groups in their reports of hand exercises.

Table 2 Participant reported frequency of hand exercises for their RA [n(%)] for those that responded to the extended follow-up

|                                                         | 4 Months   |                    | 12 Months  |                    | Extended follow-up |                    |
|---------------------------------------------------------|------------|--------------------|------------|--------------------|--------------------|--------------------|
|                                                         | Usual Care | Exercise programme | Usual Care | Exercise programme | Usual Care         | Exercise programme |
| <b>Participant reported frequency of hand exercises</b> | n=169      | n=152              | n=171      | n=155              | n=173              | n=155              |
| <b>At least 3 times a week</b>                          | 80 (48.2)  | 107 (71.8)         | 66 (39.1)  | 61 (40.4)          | 60 (34.9)          | 48 (31.4)          |
| <b>Less than 3 times a week</b>                         | 36 (21.7)  | 26 (17.5)          | 35 (20.7)  | 53 (35.1)          | 38 (22.1)          | 48 (31.4)          |
| <b>No exercises</b>                                     | 50 (30.1)  | 16 (10.7)          | 68 (40.2)  | 39 (24.5)          | 74 (43.0)          | 57 (37.3)          |
| <b>Not answered</b>                                     | 3          | 3                  | 2          | 2                  | 1                  | 2                  |
| <b>P trend (Wilcoxon)</b>                               | <0.0001    |                    | 0.0884     |                    | 0.7715             |                    |

### Primary outcome – hand function

Figure 2 and Table 3 shows the change in MHQ hand function subscale scores over time for those completing the extended follow-up. Best practice usual care resulted in small but statistically significant improvements in hand function at 4 and 12 months, in comparison to baseline values. However, the within group difference between baseline and extended follow-up was not statistically significant [Mean MHQ hand function subscale score at baseline = 54.1 (SD15.65); extended follow-up = 56.1 (SD18.85);  $p=0.1122$ ].

**Figure 2 Mean change from baseline over time for the primary and secondary outcomes for those who responded to the extended follow-up. Error bars represent the standard error. For the number of participants providing data for each outcome at each time point please refer to Table 3.**

Table 3 Estimates of effect in primary outcome and patient reported secondary outcome measures for those who responded to the extended follow-up.

|                                       | Mean change from Baseline (95% CI) |                       | Mean treatment difference<br>(95% CI) | P value | Number of participants<br>confirmed |
|---------------------------------------|------------------------------------|-----------------------|---------------------------------------|---------|-------------------------------------|
|                                       | Usual Care                         | Exercise programme    |                                       |         |                                     |
| <b>MHQ</b>                            |                                    |                       |                                       |         |                                     |
| <b>Overall hand function</b>          |                                    |                       |                                       |         |                                     |
| 4 Months                              | 3.27 (1.15 to 5.39)                | 9.27 (7.19 to 11.34)  | 6.24 (3.56 to 8.92)***                | <0.0001 | 320                                 |
| 12 Months                             | 3.19 (0.79 to 5.59)                | 7.18 (5.02 to 9.33)   | 3.91 (0.71 to 7.10)*                  | 0.0171  | 324                                 |
| Extended follow-up                    | 1.97 (-0.45 to 4.39)               | 3.76 (1.50 to 6.02)   | 1.52 (-1.71 to 4.76)                  | 0.3567  | 327                                 |
| <b>MHQ</b>                            |                                    |                       |                                       |         |                                     |
| <b>ADL (both hands)</b>               |                                    |                       |                                       |         |                                     |
| 4 Months                              | 3.37 (0.94 to 5.79)                | 8.29 (5.61 to 10.96)  | 5.07 (1.73 to 8.42)**                 | 0.0032  | 319                                 |
| 12 Months                             | 2.53 (-0.12 to 5.18)               | 5.34 (2.71 to 7.97)   | 2.83 (-0.90 to 6.56)                  | 0.1375  | 323                                 |
| Extended follow-up                    | 2.34 (0.03 to 4.66)                | 3.15 (0.30 to 6.01)   | 0.72 (-2.88 to 4.32)                  | 0.6948  | 324                                 |
| <b>MHQ</b>                            |                                    |                       |                                       |         |                                     |
| <b>Work</b>                           |                                    |                       |                                       |         |                                     |
| 4 Months                              | 4.91 (1.91 to 7.91)                | 8.26 (5.47 to 11.04)  | 3.04 (-0.96 to 7.04)                  | 0.1370  | 316                                 |
| 12 Months                             | 2.97 (-0.05 to 5.99)               | 7.70 (4.73 to 10.68)  | 4.44 (0.30 to 8.57)*                  | 0.0363  | 323                                 |
| Extended follow-up                    | 5.81 (2.97 to 8.65)                | 7.76 (4.67 to 10.84)  | 2.06 (-2.10 to 6.22)                  | 0.3318  | 315                                 |
| <b>SF 12</b>                          |                                    |                       |                                       |         |                                     |
| <b>Mental Component Score (MCS)</b>   |                                    |                       |                                       |         |                                     |
| 4 Months                              | 0.70 (-0.62 to 2.02)               | 1.09(-0.18 to 2.37)   | 0.51 (-1.16 to 2.18)                  | 0.5488  | 319                                 |
| 12 Months                             | 0.21 (-1.21 to 1.64)               | 2.12 (0.54 to 3.69)   | 1.63 (-0.22 to 3.49)                  | 0.0857  | 322                                 |
| Extended follow-up                    | 0.21 (-1.23 to 1.66)               | 0.27 (-1.25 to 1.78)  | 0.22 (-1.71 to 2.15)                  | 0.8252  | 326                                 |
| <b>SF 12</b>                          |                                    |                       |                                       |         |                                     |
| <b>Physical Component Score (PCS)</b> |                                    |                       |                                       |         |                                     |
| 4 Months                              | 0.62 (-0.39 to 1.63)               | 1.84 (0.65 to 3.02)   | 1.37 (-0.12 to 2.86)                  | 0.0719  | 319                                 |
| 12 Months                             | -0.09 (-1.24 to 1.06)              | 0.76 (-0.39 to 1.92)  | 0.72 (-0.79 to 2.23)                  | 0.3519  | 321                                 |
| Extended follow-up                    | -0.51 (-1.66 to 0.64)              | 0.19 (-1.16 to 1.54)  | 0.50 (-1.24 to 2.25)                  | 0.5720  | 326                                 |
| <b>EQ-5D Health state</b>             |                                    |                       |                                       |         |                                     |
| 4 Months                              | 0.0 (-0.03 to 0.04)                | 0.06 (0.02,0.09)      | 0.03 (-0.01 to 0.07)                  | 0.1654  | 319                                 |
| 12 Months                             | 0.02 (-0.02 to 0.05)               | 0.04 (0.00 to 0.07)   | 0.00 (-0.04 to 0.05)                  | 0.8239  | 322                                 |
| Extended follow-up                    | -0.01 (-0.05 to 0.02)              | -0.01 (-0.05 to 0.03) | -0.01 (-0.06 to 0.04)                 | 0.6893  | 324                                 |

|                                                             |                        |                        |                       |        |     |
|-------------------------------------------------------------|------------------------|------------------------|-----------------------|--------|-----|
| <b>Pain troublesomeness score<sup>†</sup></b>               |                        |                        |                       |        |     |
| <b>4 Months</b>                                             | -4.79 (-7.76 to -1.82) | -5.57 (-8.25 to -2.90) | -2.51 (-6.22 to 1.21) | 0.1872 | 315 |
| <b>12 Months</b>                                            | -4.68 (-7.83 to -1.53) | -5.03 (-8.16 to -1.90) | -1.58 (-5.65 to 2.48) | 0.4454 | 322 |
| <b>Extended follow-up</b>                                   | -3.79 (-6.93 to -0.64) | 0.20 (-2.98 to 3.38)   | 3.23 (-0.83 to 7.28)  | 0.1199 | 326 |
| <b>Self-efficacy – confidence to manage their condition</b> |                        |                        |                       |        |     |
| <b>4 Months</b>                                             | 2.38 (-0.15 to 4.62)   | 6.58 (3.74 to 9.42)    | 3.41 (0.5 to 6.29)*   | 0.0209 | 319 |
| <b>12 Months</b>                                            | 1.30 (-1.32 to 3.92)   | 5.46 (2.29 to 8.62)    | 3.19 (0.71 to 6.98)   | 0.1113 | 321 |
| <b>Extended follow-up</b>                                   | 0.22 (-2.34 to 2.78)   | 2.96 (0.03 to 5.90)    | 2.30 (-1.20 to 5.79)  | 0.1988 | 323 |

\*\*\*p<0.001; \*\* p<0.01; \*p<0.05; † Higher score = more pain

1  
2  
3 Exercise resulted in substantial improvements from baseline, with the peak effect at 4 months. For  
4 both 4 and 12 months differences between the exercise and best practice usual care group were  
5 statistically and clinically significant. By the extended follow-up time point the exercise intervention  
6 was still associated with a significant within group improvement in hand function in comparison to  
7 baseline [Mean MHQ hand function subscale score at baseline =53.9 (SD15.1); extended follow-up =  
8 57.7 (SD18.04); p=0.0014]. However, the difference between exercise and best practice usual care  
9 interventions was no longer statistically significant (Table 3).  
10  
11  
12  
13

## 14 **Secondary outcomes**

### 15 MHQ ADL and MHQ work subscales

16  
17  
18 Significant within group differences were observed in both groups for the MHQ ADL and MHQ work  
19 subscales at the extended follow-up compared to baseline (p<0.05 and P<0.001 for best practice  
20 usual care and the exercise arms respectively). Greater improvement from baseline was seen in the  
21 exercise arm (Figure 2 and Table 3).  
22  
23  
24  
25  
26

27  
28 There was a statistically significant between group difference in the MHQ ADL subscale at 4 and 12  
29 months and the MHQ work subscale at 12 months favouring the exercise arm but this difference was  
30 no longer significant at the extended follow-up.  
31  
32

### 33 Health-related Quality of Life (SF-12 and EQ-5D)

34  
35  
36 There were no observable within group differences or between group differences at any follow-up  
37 time point as measured by the SF-12 or the EQ-5D (Figure 2 and Table 3).  
38  
39

### 40 Pain troublesomeness

41  
42  
43 There were statistically significant within group changes at the 4 and 12 months follow-up with both  
44 groups reporting less pain compared to baseline and this continued in the best practice usual care  
45 arm at extended follow-up (p=0.0196). However, the pain scores reported at extended follow-up in  
46 the exercise arm were similar to baseline scores (p=0.9039).  
47  
48

49  
50 There was no statistically significant between group difference in pain troublesomeness scores at  
51 any follow-up time point (Figure 2 and Table 3).  
52  
53  
54  
55  
56  
57  
58  
59  
60

### Self-efficacy

At extended follow-up there was a significant within group change in self-efficacy observed in the exercise arm but not the best practice usual care arm. Participants in the exercise group reported higher self-efficacy scores compared to their baseline scores ( $p=0.0496$ ) but this was not the case for the best practice usual care ( $p=0.8675$ ).

Respondents in the exercise arm reported higher self-efficacy scores at 4 months follow-up compared to the best practice usual care group but this difference was diminished at 12 months and extended follow-up so the between group difference was no longer evident (Figure 2 and Table 3).

### Participant rated improvement

Participant rated improvement in the exercise arm were significantly higher at 4 and 12 months follow-up than the best practice usual care group but there was no difference between the two groups at the extended follow-up (Table 4).

Table 4 Patient reported secondary outcome measures [n (%)] for those that responded to the extended follow-up

|                                            | 4 Months   |                    | 12 Months    |                    | Extended follow-up |                    |
|--------------------------------------------|------------|--------------------|--------------|--------------------|--------------------|--------------------|
|                                            | Usual Care | Exercise programme | Usual Care   | Exercise programme | Usual Care         | Exercise programme |
| <b>Participant rated improvement n=167</b> |            | <b>n=149</b>       | <b>n=170</b> | <b>n=151</b>       | <b>n=172</b>       | <b>n=153</b>       |
| <b>Completely recovered</b>                | 1 (0.6)    | -                  | 2 (1.2)      | 1 (0.7)            | 1 (0.6)            | -                  |
| <b>Much improved</b>                       | 18 (10.8)  | 34 (22.8)          | 14 (8.2)     | 31 (20.5)          | 22 (12.8)          | 25 (16.3)          |
| <b>Slightly improved</b>                   | 34 (20.4)  | 48 (32.2)          | 23 (13.5)    | 38 (25.2)          | 17 (9.9)           | 24 (15.7)          |
| <b>No change</b>                           | 65 (38.9)  | 45 (30.2)          | 69 (40.6)    | 47 (31.1)          | 75 (43.6)          | 58 (37.9)          |
| <b>Slightly worsened</b>                   | 41 (24.6)  | 17 (11.4)          | 49 (28.8)    | 22 (14.6)          | 41 (23.8)          | 35 (22.9)          |
| <b>Much worsened</b>                       | 8 (4.8)    | 5 (3.4)            | 12 (7.1)     | 9 (6.0)            | 15 (8.7)           | 7 (4.6)            |
| <b>Vastly worsened</b>                     | -          | -                  | 1 (0.6)      | 3 (2.0)            | 1 (0.6)            | 4 (2.6)            |
| <b>P trend (Wilcoxon)</b>                  | <0.0001    |                    | <0.0001      |                    | 0.2018             |                    |

### Multiple imputation

Multiple imputation was used to evaluate the impact of missing data and the estimate of treatment difference from baseline to extended follow-up was 1.75 (-1.20, 4.70),  $p=0.2433$ . This is similar to the non-imputed analysis suggesting that missing data was not a major influence on the study findings.

## DISCUSSION

We have evaluated the long term outcomes of an individually tailored exercise programme compared to best practice usual care for adults with RA of the hand. Between group differences had

1  
2  
3 diminished over an average follow-up time of 26 months but generally functional scores favoured  
4 the exercise group. Both groups had improved hand function compared to baseline but this was  
5 only statistically significant in the exercise group. We interpret this to mean that although functional  
6 improvements due to the exercises had reduced, they had not diminished completely. Exercise arm  
7 participants completed treatment with their therapist approximately 3 months after randomisation  
8 so for some participants it had been 2 years since attending treatment. Therefore, it is very  
9 encouraging that some benefit still persisted. We aimed to estimate exercise adherence beyond the  
10 supervised period and the data shows that by the extended follow-up many participants in the  
11 exercise arm were no longer exercising as intended. RA is a progressive disease so regular exercise  
12 of sufficient intensity is needed to maintain muscle strength. It is likely that participants were no  
13 longer achieving a sufficient dose to maintain functional improvements.  
14  
15  
16  
17  
18  
19  
20

21 Another study of upper limb exercises demonstrated a similar reduction of benefit over time where  
22 gains observed at 12 weeks were no longer evident at 26 weeks follow-up[26] with an assumption it  
23 was due to reduced adherence but this data was not collected.  
24  
25  
26

27 Another proposed mechanism by which the intervention improved function was by bolstering self-  
28 efficacy. This effect had also diminished which may be due to the fact it had been 2 years since  
29 attending treatment.  
30  
31  
32

33 One outcome favoured the best practice usual care (pain troublesomeness scores). There was no  
34 between group differences but the best practice usual care group had a small but statistically  
35 significant reduction in pain compared to baseline unlike the exercise group. However, the reduction  
36 in pain was small and we are confident the exercises did not increase pain while improving function.  
37 There was no difference in adverse events reported[11] and we conclude that the exercise  
38 programme is safe.  
39  
40  
41  
42  
43

#### 44 Clinical implications and further research

45  
46 The SARAH exercise programme is an effective adjunct to the medical management of RA for  
47 patients with hand problems, but the benefit from the exercise programme did reduce over time as  
48 participants reported doing less exercises. These findings raise important questions regarding how  
49 patients might be supported to exercise long term which is probably necessary to maintain  
50 functional gains.  
51  
52  
53  
54

55 Further research is needed to establish how ongoing support could be provided. Patients with RA are  
56 seen frequently in rheumatology outpatient clinics with the National Institute for Health and Care  
57  
58  
59  
60



1  
2  
3 Excellence (NICE) recommending annual reviews for patients with RA[27]. Staff could monitor  
4 patient's exercise participation during these appointments. However, there is uncertainty amongst  
5 health professionals about providing advice about exercise to patients with RA[28, 29]. Specialist  
6 rheumatology nurses play an important role in monitoring and supporting patients, yet, EULAR  
7 recommendations for specialist rheumatology nurses do not mention exercise[30]. There is a need  
8 to educate health professionals and patients about the importance of regular exercise. It is safe for  
9 patients with RA to exercise[26, 31] and health professionals need to be confident to advise on  
10 exercise regimes, referring to therapists when needed. Consideration should be given to how we can  
11 ensure all health professionals who see patients with RA can encourage adherence to exercise, for  
12 example, nurses or therapists working within primary care settings and not just specialist  
13 rheumatology clinics.  
14  
15  
16  
17  
18  
19  
20

21 Patients with RA have to continually modify their treatment in response to changes in their  
22 condition. This also applies to exercise which presents another challenge. The SARAH programme is  
23 manualised, with clear instructions for progressing/regressing exercises allowing patients to modify  
24 exercises when needed. Participant feedback was that this was easy to follow[12] so these types of  
25 resources could be made available to health professionals and patients to help patients to exercise  
26 regularly.  
27  
28  
29  
30  
31

### 32 Methodological limitations

33  
34 The response rate was lower than the main study. This was not unexpected as this follow-up was not  
35 planned at the outset of the study so participants were unaware they would receive the postal  
36 questionnaire. We only contacted participants by post so as not to place undue pressure on them to  
37 respond and only phoned those who requested to complete the questionnaire by phone. As a  
38 consequence, the analysis is underpowered to detect a difference in the primary and secondary  
39 outcomes. Loss to follow-up could introduce bias and there were some differences in responders  
40 and non-responders, but these were equal across treatment groups. Most notably non-responders  
41 had poorer hand function at baseline and reported lower levels of exercise adherence at earlier  
42 follow-up especially in the exercise arm. It could be expected that responders would have better  
43 outcomes compared to non-responders resulting in an overestimate of the treatment effect.  
44 However, multiple imputation techniques estimated the effect of missing data and the results were  
45 largely similar indicating that missing data did not overly influence the findings. Overall, we are  
46 confident that the participants providing data were a good representation of the total cohort. The  
47 other factor that may have influenced findings was the disease status of participants. RA is a  
48 fluctuating condition so disease status at the time of follow up may have influenced outcomes but  
49  
50  
51  
52  
53  
54  
55  
56  
57  
58  
59  
60

1  
2  
3 this information was not available. In conclusion, a hand exercise programme is an effective adjunct  
4 to current drug management to improve hand function. Participants in the exercise group had  
5 improved hand function compared to baseline more than 2 years after randomisation. Hand  
6 function had reduced over time which coincided with a reduction in hand exercises highlighting the  
7 importance of promoting long term exercise adherence amongst patients with RA.  
8  
9

## 10 11 **ACKNOWLEDGMENT AND AFFILIATIONS**

12 *Collaborating NHS sites (names as of time of participation):*

13  
14  
15  
16 Basingstoke and North Hampshire Hospitals NHS Foundation Trust (North Hampshire Hospital),  
17 Derby Hospitals NHS Foundation Trust (Royal Derby Hospital), Dorset Primary Care Trust (Victoria  
18 Hospital), George Eliot Hospital NHS Trust (George Eliot Hospital), Heart of England NHS Foundation  
19 Trust (Solihull Hospital), Nuffield Orthopaedic Centre NHS Trust (Nuffield Orthopaedic Centre), Poole  
20 Hospital NHS Foundation Trust (Poole General Hospital), Portsmouth Hospitals NHS Trust (Queen  
21 Alexandra Hospital), Royal Bournemouth NHS Foundation Trust (Christchurch Hospital) , Royal  
22 National Hospital for Rheumatic Diseases NHS Foundation Trust (Bath Royal National Hospital for  
23 Rheumatic Diseases), South Warwickshire General Hospitals NHS Trust (Warwick Hospital and  
24 Stratford Upon Avon Hospital), Sussex Community NHS Trust (Bognor Regis War Memorial Hospital),  
25 Winchester and Eastleigh Health Care Trust (Royal Hampshire County Hospital) , Worcestershire  
26 Acute Hospitals NHS Trust (Worcestershire Royal Hospital; Alexandra Hospital, Redditch;  
27 Kidderminster Hospital and Treatment Centre), Wrightington, Wigan and Leigh NHS Foundation  
28 Trust (Wrightington Hospital), University Hospitals Coventry & Warwickshire (University Hospital  
29 (Walsgrave site) and Rugby St Cross Hospital), University Hospitals of Leicester NHS Trust (Leicester  
30 Royal Infirmary and Leicester General Hospital).  
31  
32  
33  
34  
35  
36  
37  
38  
39

40  
41 *SARAH Trial team*

42  
43  
44 Chief Investigator: Prof SE Lamb

45  
46 Co-investigators: Dr J Adams, Prof MR Underwood, C McConkey, Dr J Lord, Prof A Rahman

47  
48 Trial lead: Dr MA Williams

49  
50 Trial co-ordination/Administration: Dr S Dosanjh, S Lowe, A Campbell, L Rattigan

51  
52 Research Fellows/Associates: P Heine, Dr EM Williamson, V Nichols

53  
54  
55  
56 Trial statistician: C McConkey  
57  
58  
59  
60

1  
2  
3 Health economists: Dr J Lord, C Crossan, Dr M Dritsaki, Dr M Glover  
4

5 *Research Clinicians (recruitment and data collection):*  
6

7 Olivia Neely, Catherine Gibson, Karen Hotchkiss, Frances Chilton, Jessica Thrush, Catherine Minns-  
8 Lowe, Ann Birch, Linda Webber, Nicola Clague, Sue Kennedy, Kevin Spear, Sandi Derham, Dr Jenny  
9 Lewis, Sarah Bradley, Julie Cottrell, Paula White, Carole Frosdick, Jennifer Wilson, Nicola Bassett-  
10 Burr, Maggie Walsh.  
11  
12

13  
14 *Intervention therapists (delivery of treatments):*  
15

16 Lynda Myshrall, Jane Tooby, Cherry Steinberg, Mary Grant, Roslyn Handley, Fiona Jones, Clare  
17 Pheasant, Kate Hynes, Sue Kelly (UHCW NHS Trust); Joanne Newbold, Sally Thurgarland (George  
18 Eliot Hospital NHS Trust); Jane Dickenson, Lucy Mann (South Warwickshire Hospital NHS Trust);  
19 Alison Hinton, Rachel Chapman, Sunita Farmah, Collette James, Janice Wiltshire, Jane Simons  
20 (Worcester Acute Hospitals NHS Trust); Jane Martindale, Susan Hesketh, Alison Gerrard  
21 (Wrightington, Wigan & Leigh NHS Trust); Kirsty Bancroft, Corinna Cheng (Poole Hospital NHS Trust);  
22 Caroline Wood (Royal Bournemouth NHS Trust); Lisa Small, Karen Coales, Helen Ibbunson, Anne  
23 Bonsall (Bath Royal National Hospital for Rheumatic Diseases); Caroline Mountain, Jonathan  
24 Gibbons, Esther Mavurah, Hannah Susans (Portsmouth Hospitals NHS Trust); Nicola Spear, Becky  
25 Shaylor, Leon Ghulam (Basingstoke & North Hampshire Hospital NHS Trust); Sarah Wastell (Dorset  
26 NHS Trust); Christina MacLeod, Sapphire Patterson, Jane Vadher (Winchester & Eastleigh Healthcare  
27 NHS Trust); Karen Barker, Sue Gosling, Lizelle Sander-Danby, Jon Room, Aimee Fenn, Anne Richards,  
28 Pam Clarke, Gill Rowbotham, Nicky Nolan (Nuffield Orthopaedic Centre NHS Trust); Lorraine Kendall  
29 (Bognor Regis War Memorial Hospital); Claire Charnley (Solihull Hospital); Laura Richardson, Kate  
30 Wakefield (Leicester Royal Infirmary); Victoria Jansen, Liz Radbourne, Julie Tougher (Royal Derby  
31 Hospital).  
32  
33  
34  
35  
36  
37  
38  
39  
40  
41  
42

43 *Trial Steering Committee*  
44

45 Prof Alison Hammond (Chair), Dr Chris Deighton, Dr Chris McCarthy, Prof Sallie Lamb, Dr Mark  
46 Williams, Mr John Wright (User representative)  
47  
48

49 *Data Monitoring Committee*  
50

51 Mr Ed Juszcak, Prof Paul Dieppe, Dr Helen Frost.  
52  
53  
54  
55  
56  
57  
58  
59  
60

**CONTRIBUTING STATEMENT**

EW: Design of the trial, data collection, interpretation of the data, drafting and revising of the paper, final approval of the version to be published.

CC: Data analysis and interpretation, drafting and revising the paper, final approval of the version to be published.

PH: Design of the study, data collection, interpretation of the data, revision of the paper, final approval of the version to be published.

SD: Trial administration, data collection, revision of the paper, final approval of the version to be published.

MW: Design of the study, data collection and interpretation of the data, revision of the paper, final approval of the version to be published.

SL: Conception and design of the trial, data analysis and interpretation, drafting and revising of the paper, final approval of the version to be published.

**COMPETING INTERESTS**

None.

**FUNDING**

The SARAH trial was funded by the National Institute of Health Research Health Technology Assessment Programme (NIHR HTA), project number 07/32/05.

This project benefited from facilities funded through Birmingham Science City Translational Medicine Clinical Research and Infrastructure Trials Platform, with support from Advantage West Midlands (AWM).

The preparation of this article was supported by the National Institute for Health Research (NIHR) Collaboration for Leadership in Applied Health Research and Care Oxford at Oxford Health NHS Foundation Trust. The views expressed are those of the author(s) and not necessarily those of the NHS, the NIHR or the Department of Health.

**DATA SHARING STATEMENT**

1  
2  
3 The data are available on request from the Chief Investigator (Professor Sarah Lamb).  
4

## 5 6 **References**

- 7  
8 1. Symmons D, Turner G, Webb R, et al. The prevalence of rheumatoid arthritis in the United  
9 Kingdom: new estimates for a new century. *Rheumatology (Oxford)* 2002;41(7):793-800.  
10  
11 2. Deighton C, O'Mahony R, Tosh J, et al. Management of rheumatoid arthritis: summary of NICE  
12 guidance. *BMJ* 2009;338:b702.  
13  
14 3. Luqmani R, Hennell S, Estrach C, et al. British Society for Rheumatology and British Health  
15 Professionals in Rheumatology guideline for the management of rheumatoid arthritis (after the first  
16 2 years). *Rheumatology (Oxford)* 2009;48(4):436-9.  
17  
18 4. Brighton SW, Lubbe JE, van der Merwe CA. The effect of a long-term exercise programme on the  
19 rheumatoid hand. *British Journal of Rheumatology* 1993;32(5):392-5.  
20  
21 5. Buljina AI, Taljanovic MS, Avdic DM, et al. Physical and exercise therapy for treatment of the  
22 rheumatoid hand. *Arthritis & Rheumatism* 2001;45(4):392-7.  
23  
24 6. Dellhag B, Wollersjo I, Bjelle A. Effect of active hand exercise and wax bath treatment in  
25 rheumatoid arthritis patients. *Arthritis Care & Research* 1992;5(2):87-92.  
26  
27 7. Hoening H, Groff G, Pratt K, et al. A randomized controlled trial of home exercise on the  
28 rheumatoid hand. *Journal of Rheumatology* 1993;20(5):785-9.  
29  
30 8. O'Brien AV, Jones P, Mullis R, et al. Conservative hand therapy treatments in rheumatoid arthritis-  
31 a randomized controlled trial. *Rheumatology* 2006;45(5):577-83.  
32  
33 9. Adams J, Bridle C, Dosanjh S, et al. Strengthening and stretching for rheumatoid arthritis of the  
34 hand (SARAH): design of a randomised controlled trial of a hand and upper limb exercise  
35 intervention--ISRCTN89936343. *BMC Musculoskelet Disord* 2012;13:230.  
36  
37 10. Heine PJ, Williams MA, Williamson E, et al. Development and delivery of an exercise intervention  
38 for rheumatoid arthritis: strengthening and stretching for rheumatoid arthritis of the hand (SARAH)  
39 trial. *Physiotherapy* 2012;98(2):121-30.  
40  
41 11. Lamb SE, Williamson EM, Heine PJ, et al. Exercises to improve function of the rheumatoid hand  
42 (SARAH): a randomised controlled trial. *Lancet* 2015;385(9966):421-9.  
43  
44  
45  
46  
47  
48  
49  
50  
51  
52  
53  
54  
55  
56  
57  
58  
59  
60

- 1  
2  
3 12. Williams MA, Williamson EM, Heine PJ, et al. Strengthening And stretching for Rheumatoid  
4 Arthritis of the Hand (SARAH). A randomised controlled trial and economic evaluation. Health  
5 Technol Assess 2015;19(19):1-222.  
6  
7  
8  
9 13. Lemmey A, Marcora S, Chester K, et al. Effects of high-intensity resistance training in patients  
10 with rheumatoid arthritis: a randomized controlled trial. Arthritis Rheum 2009;61(12):1726-34.  
11  
12  
13 14. Swärdh E, Biguet G, Opava C. Views on exercise maintenance: variations among patients with  
14 rheumatoid arthritis. Phys Ther 2008;88(9):1049-60.  
15  
16  
17 15. Michie S, Rumsey N, Fussell A, et al. *Improving health: changing behaviour - NHS health trainer*  
18 *handbook*. Department of Health. Best Practice Guidance 9721.  
19  
20  
21 16. American College of Rheumatology. Guidelines for the management of rheumatoid arthritis:  
22 2002 Update. Arthritis Rheum 2002;46(2):328-46.  
23  
24  
25 17. Massy-Westropp N, Krishnan J, Ahern M. Comparing the AUSCAN Osteoarthritis Hand Index,  
26 Michigan Hand Outcomes Questionnaire, and Sequential Occupational Dexterity Assessment for  
27 patients with rheumatoid arthritis. J Rheumatol 2004;31(10):1996-2001.  
28  
29  
30 18. van der Giesen F, Nelissen R, Arendzen J, et al. Responsiveness of the Michigan Hand Outcomes  
31 Questionnaire--Dutch language version in patients with rheumatoid arthritis. Arch Phys Med Rehabil  
32 2008;89(6):1121-6.  
33  
34  
35 19. Adams J, Mullee M, Burridge J, et al. Responsiveness of self-report and therapist-rated upper  
36 extremity structural impairment and functional outcome measures in early rheumatoid arthritis.  
37 Arthritis Care Res (Hoboken) 2010;62(2):274-8.  
38  
39  
40 20. Parsons S, Carnes D, Pincus T, et al. Measuring troublesomeness of chronic pain by location. BMC  
41 Musculoskelet Disord 2006;7:34.  
42  
43  
44 21. Lorig K. *Outcome measures for health education and other health care interventions*. Thousand  
45 Oaks: Sage Publications, 1996.  
46  
47  
48 22. Brooks R. EuroQol: the current state of play. Health Policy 1996;37(1):53-72.  
49  
50  
51 23. Jenkinson C, Layte R. Development and testing of the UK SF-12 (short form health survey). J  
52 Health Serv Res Policy 1997;2(1):14-8.  
53  
54  
55 24. Fuchs HA, Brooks RH, Callahan LF, et al. A simplified twenty-eight-joint quantitative articular  
56 index in rheumatoid arthritis. Arthritis Rheum 1989;32(5):531-7.  
57  
58  
59  
60

1  
2  
3 25. Lineker S, Badley E, Hawker G, et al. Determining sensitivity to change in outcome measures used  
4 to evaluate hydrotherapy exercise programs for people with rheumatic diseases. *Arthritis Care Res*  
5 2000;13(1):62-5.  
6  
7

8  
9 26. Manning VL, Hurley MV, Scott DL, et al. Education, self-management, and upper extremity  
10 exercise training in people with rheumatoid arthritis: a randomized controlled trial. *Arthritis Care*  
11 *Res (Hoboken)* 2014;66(2):217-27.  
12  
13

14 27. National Institute of Health and Care Excellence. NICE clinical guideline 79: The management of  
15 rheumatoid arthritis in adults, 2009.  
16  
17

18 28. Iversen MD, Fossel AH, Ayers K, et al. Predictors of exercise behavior in patients with rheumatoid  
19 arthritis 6 months following a visit with their rheumatologist. *Phys Ther* 2004;84(8):706-16.  
20  
21

22 29. Hurkmans EJ, de Gucht V, Maes S, et al. Promoting physical activity in patients with rheumatoid  
23 arthritis: rheumatologists' and health professionals' practice and educational needs. *Clin Rheumatol*  
24 2011;30(12):1603-9.  
25  
26  
27

28 30. van Eijk-Hustings Y, van Tubergen A, Boström C, et al. EULAR recommendations for the role of  
29 the nurse in the management of chronic inflammatory arthritis. *Ann Rheum Dis* 2012;71(1):13-9.  
30  
31

32 31. Cooney JK, Law RJ, Matschke V, et al. Benefits of exercise in rheumatoid arthritis. *J Aging Res*  
33 2011;2011:Article Numer 681640.  
34  
35

## 36 FIGURES

37  
38  
39 **Figure 1 – CONSORT Flow diagram**

40  
41 **Figure 2 Mean change from baseline over time for the primary and secondary outcomes for those**  
42 **who responded to the extended follow-up. Error bars represent the standard error. For the**  
43 **number of participants providing data for each outcome at each time point please refer to Table 3.**  
44  
45  
46  
47  
48  
49  
50  
51  
52  
53  
54  
55  
56  
57  
58  
59  
60

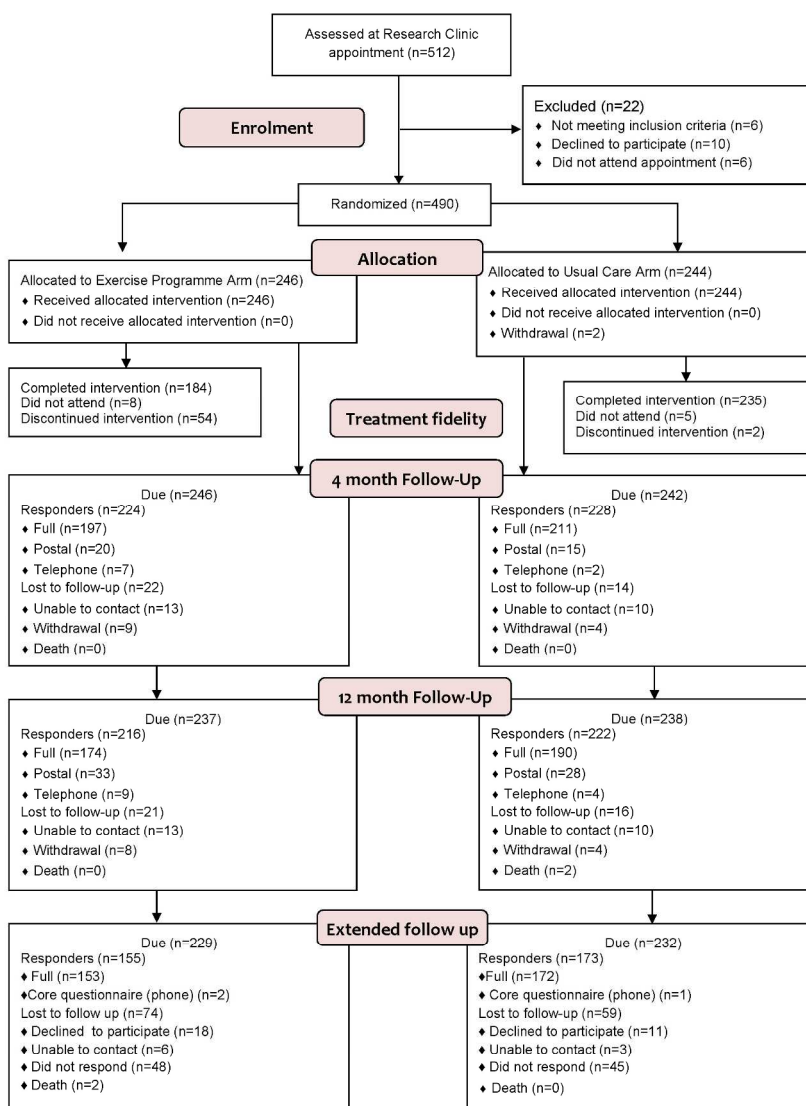

Figure 1 Consort Flow Chart

215x279mm (300 x 300 DPI)



1  
2  
3  
4  
5  
6  
7  
8  
9  
10  
11  
12  
13  
14  
15  
16  
17  
18  
19  
20  
21  
22  
23  
24  
25  
26  
27  
28  
29  
30  
31  
32  
33  
34  
35  
36  
37  
38  
39  
40  
41  
42  
43  
44  
45  
46  
47  
48  
49  
50  
51  
52  
53  
54  
55  
56  
57  
58  
59  
60

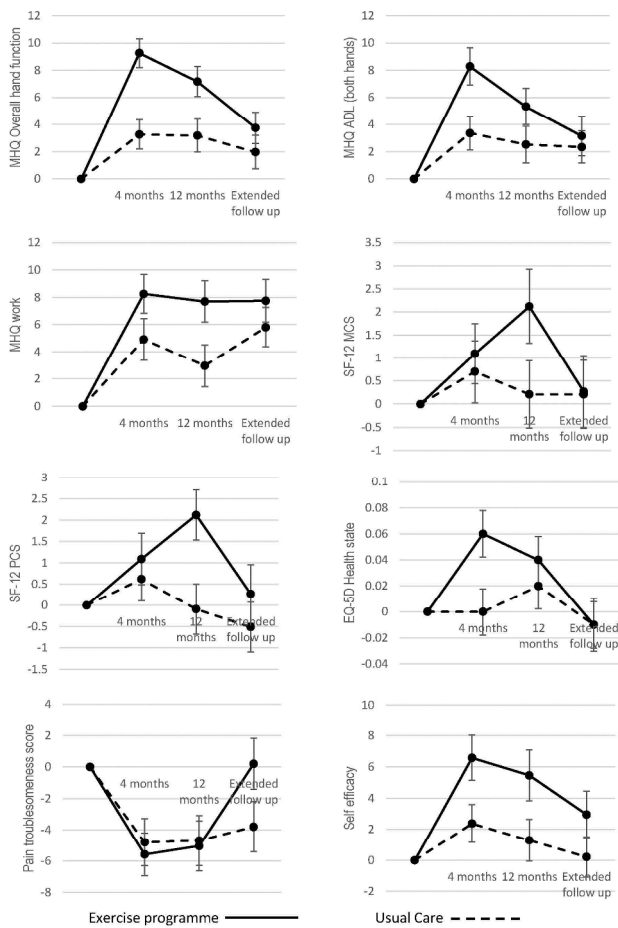

Graphs

210x297mm (300 x 300 DPI)



## CONSORT 2010 checklist of information to include when reporting a randomised trial\*

| Section/Topic                    | Item No | Checklist item                                                                                                                        | Reported on page No                           |
|----------------------------------|---------|---------------------------------------------------------------------------------------------------------------------------------------|-----------------------------------------------|
| <b>Title and abstract</b>        |         |                                                                                                                                       |                                               |
|                                  | 1a      | Identification as a randomised trial in the title                                                                                     | 1                                             |
|                                  | 1b      | Structured summary of trial design, methods, results, and conclusions (for specific guidance see CONSORT for abstracts)               | 2 Abstract                                    |
| <b>Introduction</b>              |         |                                                                                                                                       |                                               |
| Background and objectives        | 2a      | Scientific background and explanation of rationale                                                                                    | 4                                             |
|                                  | 2b      | Specific objectives or hypotheses                                                                                                     | 4                                             |
| <b>Methods</b>                   |         |                                                                                                                                       |                                               |
| Trial design                     | 3a      | Description of trial design (such as parallel, factorial) including allocation ratio                                                  | 4                                             |
|                                  | 3b      | Important changes to methods after trial commencement (such as eligibility criteria), with reasons                                    | N/A                                           |
| Participants                     | 4a      | Eligibility criteria for participants                                                                                                 | 4-5                                           |
|                                  | 4b      | Settings and locations where the data were collected                                                                                  | 4-5                                           |
| Interventions                    | 5       | The interventions for each group with sufficient details to allow replication, including how and when they were actually administered | 5 – reference provided for intervention paper |
| Outcomes                         | 6a      | Completely defined pre-specified primary and secondary outcome measures, including how and when they were assessed                    | 5-6                                           |
|                                  | 6b      | Any changes to trial outcomes after the trial commenced, with reasons                                                                 | N/A                                           |
| Sample size                      | 7a      | How sample size was determined                                                                                                        | 6                                             |
|                                  | 7b      | When applicable, explanation of any interim analyses and stopping guidelines                                                          | N/A                                           |
| <b>Randomisation:</b>            |         |                                                                                                                                       |                                               |
| Sequence generation              | 8a      | Method used to generate the random allocation sequence                                                                                | 6                                             |
|                                  | 8b      | Type of randomisation; details of any restriction (such as blocking and block size)                                                   | 6                                             |
| Allocation concealment mechanism | 9       |                                                                                                                                       | 6                                             |
| Implementation                   | 10      | Who generated the random allocation sequence, who enrolled participants, and who assigned participants to                             | 6                                             |

|                                                      |     |                                                                                                                                                   |                                                                     |
|------------------------------------------------------|-----|---------------------------------------------------------------------------------------------------------------------------------------------------|---------------------------------------------------------------------|
|                                                      |     | interventions                                                                                                                                     |                                                                     |
| Blinding                                             | 11a | If done, who was blinded after assignment to interventions (for example, participants, care providers, those assessing outcomes) and how          | 6                                                                   |
|                                                      | 11b | If relevant, description of the similarity of interventions                                                                                       | N/A                                                                 |
| Statistical methods                                  | 12a | Statistical methods used to compare groups for primary and secondary outcomes                                                                     | 6-7                                                                 |
|                                                      | 12b | Methods for additional analyses, such as subgroup analyses and adjusted analyses                                                                  | 6-7                                                                 |
| <b>Results</b>                                       |     |                                                                                                                                                   |                                                                     |
| Participant flow (a diagram is strongly recommended) | 13a | For each group, the numbers of participants who were randomly assigned, received intended treatment, and were analysed for the primary outcome    | 7, Figure 1, Tables 1-4                                             |
|                                                      | 13b | For each group, losses and exclusions after randomisation, together with reasons                                                                  | Figure 1                                                            |
| Recruitment                                          | 14a | Dates defining the periods of recruitment and follow-up                                                                                           | 5                                                                   |
|                                                      | 14b | Why the trial ended or was stopped                                                                                                                | N/A                                                                 |
| Baseline data                                        | 15  | A table showing baseline demographic and clinical characteristics for each group                                                                  | Table 1                                                             |
| Numbers analysed                                     | 16  | For each group, number of participants (denominator) included in each analysis and whether the analysis was by original assigned groups           | Tables 2-4<br>5                                                     |
| Outcomes and estimation                              | 17a | For each primary and secondary outcome, results for each group, and the estimated effect size and its precision (such as 95% confidence interval) | Tables 2-4                                                          |
|                                                      | 17b | For binary outcomes, presentation of both absolute and relative effect sizes is recommended                                                       | N/A                                                                 |
| Ancillary analyses                                   | 18  | Results of any other analyses performed, including subgroup analyses and adjusted analyses, distinguishing pre-specified from exploratory         | 16                                                                  |
| Harms                                                | 19  | All important harms or unintended effects in each group (for specific guidance see CONSORT for harms)                                             | 17 Adverse events reported in main trial paper – reference provided |
| <b>Discussion</b>                                    |     |                                                                                                                                                   |                                                                     |
| Limitations                                          | 20  | Trial limitations, addressing sources of potential bias, imprecision, and, if relevant, multiplicity of analyses                                  | 18                                                                  |
| Generalisability                                     | 21  | Generalisability (external validity, applicability) of the trial findings                                                                         | 18                                                                  |
| Interpretation                                       | 22  | Interpretation consistent with results, balancing benefits and harms, and considering other relevant evidence                                     | 16-18                                                               |
| <b>Other information</b>                             |     |                                                                                                                                                   |                                                                     |

1  
2  
3  
4  
5  
6  
7  
8  
9  
10  
11  
12  
13  
14  
15  
16  
17  
18  
19  
20  
21  
22  
23  
24  
25  
26  
27  
28  
29  
30  
31  
32  
33  
34  
35  
36  
37  
38  
39  
40  
41  
42  
43  
44  
45  
46  
47  
48  
49

|              |    |                                                                                 |       |
|--------------|----|---------------------------------------------------------------------------------|-------|
| Registration | 23 | Registration number and name of trial registry                                  | 4     |
| Protocol     | 24 | Where the full trial protocol can be accessed, if available                     | 4     |
| Funding      | 25 | Sources of funding and other support (such as supply of drugs), role of funders | 20-21 |

\*We strongly recommend reading this statement in conjunction with the CONSORT 2010 Explanation and Elaboration for important clarifications on all the items. If relevant, we also recommend reading CONSORT extensions for cluster randomised trials, non-inferiority and equivalence trials, non-pharmacological treatments, herbal interventions, and pragmatic trials. Additional extensions are forthcoming: for those and for up to date references relevant to this checklist, see [www.consort-statement.org](http://www.consort-statement.org).

For peer review only
